# Supplementary material for: A Prognostic Model Based on RNA Binding Protein Predicts Clinical Outcomes in Hepatocellular Carcinoma Patients
Source: Front Oncol. 2021 Feb 12;10:613102. doi: 10.3389/fonc.2020.613102 (PMC7907500; doi:10.3389/fonc.2020.613102)
Supplement: Supplementary file 7 [file Table_6.xlsx]

## Sheet: BP
Terms	ID	Description	GeneRatio	BgRatio	pvalue	p.adjust	qvalue	geneID	Count
BP	GO:0034470	ncRNA processing	46/168	384/18670	8.43604e-39	1.31012e-35	1.09402e-35	AARS2/ADAT2/BOP1/CPSF1/CPSF4/CSTF2/CTU1/DCAF13/DDX49/DHX37/DROSHA/EXOSC4/FBL/GTPBP3/HEATR1/INTS3/INTS7/INTS8/METTL3/MRM1/NHP2/NOP56/NPM3/NSUN5/POP1/PTCD1/PUS1/PUS7/PUSL1/RCL1/RPP21/RPP40/RPS21/RRP15/RRP9/RRS1/TARBP1/TRMT1/TRMT6/TRMT61A/TRMU/TSEN15/TSEN54/UTP14A/WDR4/WDR46	46
BP	GO:0008380	RNA splicing	42/168	469/18670	4.33276e-30	3.36439e-27	2.80945e-27	AKAP8L/CASC3/CLK2/CPSF1/CPSF4/CSTF2/DDX39A/DDX39B/DDX41/FASTK/FUS/GPATCH1/LSM2/LSM4/MBNL2/METTL3/NOL3/PABPC1/POLR2K/PRPF3/PRPF39/PUF60/RALY/RBM24/RBM3/SF3A2/SF3B4/SFSWAP/SNRPA/SNRPA1/SNRPB/SNRPC/SNRPD1/SNRPD2/SNRPE/SUGP2/THOC5/TSEN15/TSEN54/TTF2/UPF3B/WDR83	42
BP	GO:0000377	RNA splicing, via transesterification reactions with bulged adenosine as nucleophile	34/168	379/18670	2.39507e-24	9.29887e-22	7.76508e-22	CASC3/CPSF1/CPSF4/CSTF2/DDX39A/DDX39B/DDX41/FUS/GPATCH1/LSM2/LSM4/MBNL2/METTL3/NOL3/PABPC1/POLR2K/PRPF3/PRPF39/PUF60/RALY/RBM24/RBM3/SF3A2/SF3B4/SFSWAP/SNRPA/SNRPA1/SNRPB/SNRPC/SNRPD1/SNRPD2/SNRPE/UPF3B/WDR83	34
BP	GO:0000398	mRNA splicing, via spliceosome	34/168	379/18670	2.39507e-24	9.29887e-22	7.76508e-22	CASC3/CPSF1/CPSF4/CSTF2/DDX39A/DDX39B/DDX41/FUS/GPATCH1/LSM2/LSM4/MBNL2/METTL3/NOL3/PABPC1/POLR2K/PRPF3/PRPF39/PUF60/RALY/RBM24/RBM3/SF3A2/SF3B4/SFSWAP/SNRPA/SNRPA1/SNRPB/SNRPC/SNRPD1/SNRPD2/SNRPE/UPF3B/WDR83	34
BP	GO:0000375	RNA splicing, via transesterification reactions	34/168	382/18670	3.10331e-24	9.63888e-22	8.04901e-22	CASC3/CPSF1/CPSF4/CSTF2/DDX39A/DDX39B/DDX41/FUS/GPATCH1/LSM2/LSM4/MBNL2/METTL3/NOL3/PABPC1/POLR2K/PRPF3/PRPF39/PUF60/RALY/RBM24/RBM3/SF3A2/SF3B4/SFSWAP/SNRPA/SNRPA1/SNRPB/SNRPC/SNRPD1/SNRPD2/SNRPE/UPF3B/WDR83	34
BP	GO:0008033	tRNA processing	22/168	130/18670	4.54112e-22	1.17539e-19	9.8152e-20	AARS2/ADAT2/CPSF1/CPSF4/CSTF2/CTU1/GTPBP3/POP1/PTCD1/PUS1/PUS7/PUSL1/RPP21/RPP40/TARBP1/TRMT1/TRMT6/TRMT61A/TRMU/TSEN15/TSEN54/WDR4	22
BP	GO:0006399	tRNA metabolic process	25/168	193/18670	5.56761e-22	1.23522e-19	1.03147e-19	AARS2/AARSD1/ADAT2/CPSF1/CPSF4/CSTF2/CTU1/DARS2/EEF1E1/GTPBP3/POP1/PTCD1/PUS1/PUS7/PUSL1/RPP21/RPP40/TARBP1/TRMT1/TRMT6/TRMT61A/TRMU/TSEN15/TSEN54/WDR4	25
BP	GO:0090501	RNA phosphodiester bond hydrolysis	23/168	154/18670	9.75405e-22	1.8935e-19	1.58118e-19	ANG/AZGP1/BOP1/CNOT6/CPSF1/CPSF4/CSTF2/DROSHA/EDC3/EXO1/EXOG/EXOSC4/NHP2/POP1/RCL1/RNASE4/RNASEH2A/RPP21/RPP40/RPS21/RRS1/TSEN15/TSEN54	23
BP	GO:0031123	RNA 3'-end processing	22/168	150/18670	1.18503e-20	2.04483e-18	1.70755e-18	BARD1/CASC3/CPEB3/CPSF1/CPSF4/CSTF2/DDX39A/DDX39B/EXOSC4/FBL/INTS7/INTS8/LSM11/PABPC1/PABPC1L/PTCD1/RPS21/SNRPA/THOC5/UPF3B/ZC3H3/ZNF473	22
BP	GO:0006401	RNA catabolic process	30/168	397/18670	2.16185e-19	3.35735e-17	2.80357e-17	CASC3/CNOT6/CPEB3/DHX34/DROSHA/EDC3/EXOSC4/IGF2BP1/IGF2BP2/IGF2BP3/LARP1/LSM2/LSM4/METTL3/NANOS1/NPM1/PABPC1/PCBP4/POP1/RBM24/RNASEH2A/RPL36A/RPL8/RPS21/RPSA/SAMD4B/SMG5/SMG9/UPF3B/ZFP36	30
BP	GO:0016072	rRNA metabolic process	25/168	253/18670	4.60765e-19	6.50517e-17	5.43218e-17	ANG/BOP1/CD3EAP/DCAF13/DDX49/DHX37/DROSHA/EXOSC4/FBL/HEATR1/MRM1/NHP2/NOP56/NPM3/NSUN5/POLR1E/RCL1/RPP40/RPS21/RRP15/RRP9/RRS1/TCOF1/UTP14A/WDR46	25
BP	GO:0006402	mRNA catabolic process	27/168	364/18670	2.60554e-17	3.37201e-15	2.81582e-15	CASC3/CNOT6/CPEB3/DHX34/EDC3/EXOSC4/IGF2BP1/IGF2BP2/IGF2BP3/LARP1/LSM2/LSM4/METTL3/NANOS1/NPM1/PABPC1/PCBP4/RBM24/RPL36A/RPL8/RPS21/RPSA/SAMD4B/SMG5/SMG9/UPF3B/ZFP36	27
BP	GO:0090305	nucleic acid phosphodiester bond hydrolysis	25/168	302/18670	3.27639e-17	3.91402e-15	3.26843e-15	ANG/AZGP1/BOP1/CNOT6/CPSF1/CPSF4/CSTF2/DROSHA/EDC3/EXO1/EXOG/EXOSC4/NHP2/PARP1/POP1/RCL1/RNASE4/RNASEH2A/RPP21/RPP40/RPS21/RRS1/TSEN15/TSEN54/ZFP36	25
BP	GO:0090502	RNA phosphodiester bond hydrolysis, endonucleolytic	15/168	77/18670	2.37072e-16	2.62981e-14	2.19604e-14	BOP1/DROSHA/EDC3/EXO1/EXOG/POP1/RCL1/RNASE4/RNASEH2A/RPP21/RPP40/RPS21/RRS1/TSEN15/TSEN54	15
BP	GO:0031124	mRNA 3'-end processing	16/168	98/18670	4.48245e-16	4.52897e-14	3.78194e-14	BARD1/CASC3/CPEB3/CPSF1/CPSF4/CSTF2/DDX39A/DDX39B/LSM11/PABPC1/PABPC1L/SNRPA/THOC5/UPF3B/ZC3H3/ZNF473	16
BP	GO:0009451	RNA modification	19/168	163/18670	4.66603e-16	4.52897e-14	3.78194e-14	AARS2/ADAT2/CTU1/FBL/GTPBP3/METTL3/MRM1/NHP2/NSUN5/PUS1/PUS7/PUSL1/RPUSD1/TARBP1/TRMT1/TRMT6/TRMT61A/TRMU/WDR4	19
BP	GO:0006417	regulation of translation	27/168	424/18670	1.18424e-15	1.08184e-13	9.03397e-14	ANG/CASC3/CNOT6/CPEB3/DDX39B/EIF4E3/EIF5A2/IGF2BP1/IGF2BP2/IGF2BP3/ILF3/LARP1/METTL3/MRPL13/MTG1/NANOS1/NPM1/PABPC1/PAIP2B/PUS7/RBM24/RBM3/SAMD4B/TCOF1/UNK/UPF3B/ZFP36	27
BP	GO:0006403	RNA localization	21/168	230/18670	1.84924e-15	1.59548e-13	1.33231e-13	AKAP8L/CASC3/CPSF1/CPSF4/DDX39A/DDX39B/EIF5A2/FBL/IGF2BP1/IGF2BP2/IGF2BP3/NHP2/NPM1/RRS1/RUVBL1/SMG5/THOC5/UPF3B/XPO5/ZC3H3/ZFP36	21
BP	GO:0042254	ribosome biogenesis	23/168	297/18670	2.83704e-15	2.3189e-13	1.93642e-13	BOP1/DCAF13/DDX49/DHX37/DROSHA/EXOSC4/FBL/HEATR1/MRM1/NHP2/NOP56/NPM1/NPM3/NSUN5/RCL1/RPP40/RPS21/RPSA/RRP15/RRP9/RRS1/UTP14A/WDR46	23
BP	GO:0034248	regulation of cellular amide metabolic process	28/168	483/18670	3.61295e-15	2.80545e-13	2.34271e-13	ANG/CASC3/CNOT6/CPEB3/DDX39B/EEF1A2/EIF4E3/EIF5A2/IGF2BP1/IGF2BP2/IGF2BP3/ILF3/LARP1/METTL3/MRPL13/MTG1/NANOS1/NPM1/PABPC1/PAIP2B/PUS7/RBM24/RBM3/SAMD4B/TCOF1/UNK/UPF3B/ZFP36	28
BP	GO:0006364	rRNA processing	20/168	214/18670	5.74668e-15	4.24981e-13	3.54883e-13	BOP1/DCAF13/DDX49/DHX37/EXOSC4/FBL/HEATR1/MRM1/NHP2/NOP56/NPM3/NSUN5/RCL1/RPP40/RPS21/RRP15/RRP9/RRS1/UTP14A/WDR46	20
BP	GO:1903311	regulation of mRNA metabolic process	23/168	324/18670	1.84397e-14	1.30168e-12	1.08697e-12	BARD1/CPEB3/CPSF4/DHX34/EXOSC4/IGF2BP1/IGF2BP2/IGF2BP3/LARP1/MBNL2/METTL3/NANOS1/NPM1/PABPC1/PCBP4/RBM24/RBM3/SAMD4B/SF3B4/SFSWAP/SNRPA/ZC3H3/ZFP36	23
BP	GO:0000956	nuclear-transcribed mRNA catabolic process	19/168	207/18670	3.96677e-14	2.67843e-12	2.23664e-12	CASC3/CNOT6/CPEB3/DHX34/EDC3/EXOSC4/LSM2/LSM4/NANOS1/PABPC1/RPL36A/RPL8/RPS21/RPSA/SAMD4B/SMG5/SMG9/UPF3B/ZFP36	19
BP	GO:0022618	ribonucleoprotein complex assembly	21/168	277/18670	7.56074e-14	4.89243e-12	4.08545e-12	ATXN2L/BOP1/CNOT6/DDX39B/EDC3/EIF2D/LSM4/NOL3/NPM1/PRPF3/PRPF39/RPSA/RRS1/RUVBL1/SF3A2/SFSWAP/SNRPB/SNRPC/SNRPD1/SNRPD2/SNRPE	21
BP	GO:0050657	nucleic acid transport	18/168	193/18670	1.45985e-13	8.7198e-12	7.28152e-12	AKAP8L/CASC3/CPSF1/CPSF4/DDX39A/DDX39B/EIF5A2/IGF2BP1/IGF2BP2/IGF2BP3/NPM1/RRS1/SMG5/THOC5/UPF3B/XPO5/ZC3H3/ZFP36	18
BP	GO:0050658	RNA transport	18/168	193/18670	1.45985e-13	8.7198e-12	7.28152e-12	AKAP8L/CASC3/CPSF1/CPSF4/DDX39A/DDX39B/EIF5A2/IGF2BP1/IGF2BP2/IGF2BP3/NPM1/RRS1/SMG5/THOC5/UPF3B/XPO5/ZC3H3/ZFP36	18
BP	GO:0051236	establishment of RNA localization	18/168	196/18670	1.90757e-13	1.09721e-11	9.16229e-12	AKAP8L/CASC3/CPSF1/CPSF4/DDX39A/DDX39B/EIF5A2/IGF2BP1/IGF2BP2/IGF2BP3/NPM1/RRS1/SMG5/THOC5/UPF3B/XPO5/ZC3H3/ZFP36	18
BP	GO:0071826	ribonucleoprotein complex subunit organization	21/168	291/18670	1.98863e-13	1.10298e-11	9.21048e-12	ATXN2L/BOP1/CNOT6/DDX39B/EDC3/EIF2D/LSM4/NOL3/NPM1/PRPF3/PRPF39/RPSA/RRS1/RUVBL1/SF3A2/SFSWAP/SNRPB/SNRPC/SNRPD1/SNRPD2/SNRPE	21
BP	GO:0006400	tRNA modification	13/168	86/18670	7.82033e-13	4.18792e-11	3.49715e-11	AARS2/ADAT2/CTU1/GTPBP3/PUS1/PUS7/PUSL1/TARBP1/TRMT1/TRMT6/TRMT61A/TRMU/WDR4	13
BP	GO:0006353	DNA-templated transcription, termination	12/168	75/18670	3.03323e-12	1.5702e-10	1.31121e-10	CD3EAP/CPSF1/CPSF4/CSTF2/LSM11/MAZ/POLR1E/POLR2K/SNRPB/SNRPE/TTF2/ZNF473	12
BP	GO:0015931	nucleobase-containing compound transport	18/168	241/18670	6.49856e-12	3.20511e-10	2.67645e-10	AKAP8L/CASC3/CPSF1/CPSF4/DDX39A/DDX39B/EIF5A2/IGF2BP1/IGF2BP2/IGF2BP3/NPM1/RRS1/SMG5/THOC5/UPF3B/XPO5/ZC3H3/ZFP36	18
BP	GO:0017148	negative regulation of translation	17/168	209/18670	6.60422e-12	3.20511e-10	2.67645e-10	ANG/CPEB3/IGF2BP1/IGF2BP2/IGF2BP3/ILF3/LARP1/METTL3/MRPL13/NANOS1/PAIP2B/PUS7/RBM24/RBM3/SAMD4B/UNK/ZFP36	17
BP	GO:0051028	mRNA transport	15/168	152/18670	7.52681e-12	3.54216e-10	2.9579e-10	AKAP8L/CASC3/CPSF1/CPSF4/DDX39A/DDX39B/EIF5A2/IGF2BP1/IGF2BP2/IGF2BP3/SMG5/THOC5/UPF3B/ZC3H3/ZFP36	15
BP	GO:0006369	termination of RNA polymerase II transcription	9/168	35/18670	1.8014e-11	8.22815e-10	6.87097e-10	CPSF1/CPSF4/CSTF2/LSM11/MAZ/SNRPB/SNRPE/TTF2/ZNF473	9
BP	GO:0034249	negative regulation of cellular amide metabolic process	17/168	229/18670	2.84144e-11	1.26079e-09	1.05283e-09	ANG/CPEB3/IGF2BP1/IGF2BP2/IGF2BP3/ILF3/LARP1/METTL3/MRPL13/NANOS1/PAIP2B/PUS7/RBM24/RBM3/SAMD4B/UNK/ZFP36	17
BP	GO:0061013	regulation of mRNA catabolic process	15/168	199/18670	3.53879e-10	1.5266e-08	1.27479e-08	CPEB3/DHX34/EXOSC4/IGF2BP1/IGF2BP2/IGF2BP3/LARP1/METTL3/NANOS1/NPM1/PABPC1/PCBP4/RBM24/SAMD4B/ZFP36	15
BP	GO:0043414	macromolecule methylation	18/168	309/18670	3.90607e-10	1.63949e-08	1.36907e-08	BRCA1/DNMT1/DNMT3B/EZH2/FBL/GTPBP3/MAEL/METTL3/MRM1/NSUN5/PARP1/SNRPB/TARBP1/TDRKH/TRMT1/TRMT6/TRMT61A/WDR4	18
BP	GO:0000288	nuclear-transcribed mRNA catabolic process, deadenylation-dependent decay	10/168	77/18670	1.73619e-09	7.09552e-08	5.92516e-08	CNOT6/CPEB3/EDC3/EXOSC4/LSM2/LSM4/NANOS1/PABPC1/SAMD4B/ZFP36	10
BP	GO:0006913	nucleocytoplasmic transport	18/168	343/18670	2.07029e-09	8.24402e-08	6.88422e-08	AKAP8L/BARD1/CASC3/CPSF1/CPSF4/DDX39A/DDX39B/IPO9/NPM1/RRS1/SMG5/SNRPB/SNRPD1/SNRPD2/SNRPE/THOC5/UPF3B/XPO5	18
BP	GO:0051169	nuclear transport	18/168	346/18670	2.37572e-09	9.22374e-08	7.70234e-08	AKAP8L/BARD1/CASC3/CPSF1/CPSF4/DDX39A/DDX39B/IPO9/NPM1/RRS1/SMG5/SNRPB/SNRPD1/SNRPD2/SNRPE/THOC5/UPF3B/XPO5	18
BP	GO:0001510	RNA methylation	10/168	81/18670	2.88252e-09	1.09184e-07	9.11749e-08	FBL/GTPBP3/METTL3/MRM1/NSUN5/TARBP1/TRMT1/TRMT6/TRMT61A/WDR4	10
BP	GO:0006405	RNA export from nucleus	12/168	135/18670	3.37295e-09	1.24719e-07	1.04147e-07	AKAP8L/CASC3/CPSF1/CPSF4/DDX39A/DDX39B/NPM1/RRS1/SMG5/THOC5/UPF3B/XPO5	12
BP	GO:0032259	methylation	18/168	366/18670	5.74e-09	2.07308e-07	1.73113e-07	BRCA1/DNMT1/DNMT3B/EZH2/FBL/GTPBP3/MAEL/METTL3/MRM1/NSUN5/PARP1/SNRPB/TARBP1/TDRKH/TRMT1/TRMT6/TRMT61A/WDR4	18
BP	GO:0043488	regulation of mRNA stability	13/168	177/18670	7.59467e-09	2.68057e-07	2.23843e-07	CPEB3/EXOSC4/IGF2BP1/IGF2BP2/IGF2BP3/LARP1/METTL3/NPM1/PABPC1/PCBP4/RBM24/SAMD4B/ZFP36	13
BP	GO:0042274	ribosomal small subunit biogenesis	9/168	67/18670	8.52968e-09	2.93677e-07	2.45237e-07	DCAF13/DHX37/HEATR1/NPM1/RCL1/RPS21/RPSA/RRS1/WDR46	9
BP	GO:0006611	protein export from nucleus	13/168	179/18670	8.69874e-09	2.93677e-07	2.45237e-07	AKAP8L/BARD1/CASC3/CPSF1/CPSF4/DDX39A/DDX39B/NPM1/RRS1/SMG5/THOC5/UPF3B/XPO5	13
BP	GO:0043487	regulation of RNA stability	13/168	183/18670	1.13527e-08	3.75123e-07	3.13249e-07	CPEB3/EXOSC4/IGF2BP1/IGF2BP2/IGF2BP3/LARP1/METTL3/NPM1/PABPC1/PCBP4/RBM24/SAMD4B/ZFP36	13
BP	GO:0071426	ribonucleoprotein complex export from nucleus	11/168	127/18670	2.03774e-08	6.59295e-07	5.50548e-07	AKAP8L/CASC3/CPSF1/CPSF4/DDX39A/DDX39B/NPM1/RRS1/SMG5/THOC5/UPF3B	11
BP	GO:0071166	ribonucleoprotein complex localization	11/168	128/18670	2.21215e-08	6.98008e-07	5.82876e-07	AKAP8L/CASC3/CPSF1/CPSF4/DDX39A/DDX39B/NPM1/RRS1/SMG5/THOC5/UPF3B	11
BP	GO:0051168	nuclear export	13/168	194/18670	2.28353e-08	6.98008e-07	5.82876e-07	AKAP8L/BARD1/CASC3/CPSF1/CPSF4/DDX39A/DDX39B/NPM1/RRS1/SMG5/THOC5/UPF3B/XPO5	13
BP	GO:0000462	maturation of SSU-rRNA from tricistronic rRNA transcript (SSU-rRNA, 5.8S rRNA, LSU-rRNA)	7/168	35/18670	2.29223e-08	6.98008e-07	5.82876e-07	DCAF13/DHX37/HEATR1/RCL1/RPS21/RRS1/WDR46	7
BP	GO:0006414	translational elongation	11/168	133/18670	3.29984e-08	9.85511e-07	8.22957e-07	CPEB3/DAP3/EEF1A2/EIF5A2/GTPBP2/MRPL13/MRPL24/MRPL53/MRPS12/MRPS21/MRPS23	11
BP	GO:0000245	spliceosomal complex assembly	9/168	84/18670	6.44492e-08	1.88848e-06	1.57699e-06	DDX39B/NOL3/PRPF39/SF3A2/SFSWAP/SNRPC/SNRPD1/SNRPD2/SNRPE	9
BP	GO:0006378	mRNA polyadenylation	7/168	44/18670	1.22036e-07	3.50965e-06	2.93076e-06	CPEB3/CPSF1/CSTF2/PABPC1/PABPC1L/SNRPA/ZC3H3	7
BP	GO:0000184	nuclear-transcribed mRNA catabolic process, nonsense-mediated decay	10/168	120/18670	1.3184e-07	3.72268e-06	3.10865e-06	CASC3/DHX34/PABPC1/RPL36A/RPL8/RPS21/RPSA/SMG5/SMG9/UPF3B	10
BP	GO:0006388	tRNA splicing, via endonucleolytic cleavage and ligation	5/168	15/18670	1.55178e-07	4.30342e-06	3.5936e-06	CPSF1/CPSF4/CSTF2/TSEN15/TSEN54	5
BP	GO:0030490	maturation of SSU-rRNA	7/168	46/18670	1.67898e-07	4.49562e-06	3.7541e-06	DCAF13/DHX37/HEATR1/RCL1/RPS21/RRS1/WDR46	7
BP	GO:0043631	RNA polyadenylation	7/168	46/18670	1.67898e-07	4.49562e-06	3.7541e-06	CPEB3/CPSF1/CSTF2/PABPC1/PABPC1L/SNRPA/ZC3H3	7
BP	GO:0000394	RNA splicing, via endonucleolytic cleavage and ligation	5/168	16/18670	2.24074e-07	5.89808e-06	4.92522e-06	CPSF1/CPSF4/CSTF2/TSEN15/TSEN54	5
BP	GO:0140053	mitochondrial gene expression	11/168	162/18670	2.49563e-07	6.45951e-06	5.39405e-06	AARS2/DAP3/DARS2/MRPL13/MRPL24/MRPL53/MRPS12/MRPS21/MRPS23/MTG1/PUS1	11
BP	GO:0002181	cytoplasmic translation	9/168	100/18670	2.94531e-07	7.49848e-06	6.26165e-06	CPEB3/EIF2D/METTL3/RBM24/RPL36A/RPL8/RPS21/RPSA/UNK	9
BP	GO:0001522	pseudouridine synthesis	5/168	17/18670	3.15132e-07	7.89355e-06	6.59155e-06	NHP2/PUS1/PUS7/PUSL1/RPUSD1	5
BP	GO:0032543	mitochondrial translation	10/168	135/18670	3.9848e-07	9.82286e-06	8.20264e-06	AARS2/DAP3/DARS2/MRPL13/MRPL24/MRPL53/MRPS12/MRPS21/MRPS23/MTG1	10
BP	GO:0050684	regulation of mRNA processing	10/168	137/18670	4.56876e-07	1.09576e-05	9.15019e-06	BARD1/CPEB3/CPSF4/MBNL2/RBM24/RBM3/SF3B4/SFSWAP/SNRPA/ZC3H3	10
BP	GO:0000387	spliceosomal snRNP assembly	7/168	53/18670	4.58624e-07	1.09576e-05	9.15019e-06	LSM4/PRPF3/SNRPB/SNRPC/SNRPD1/SNRPD2/SNRPE	7
BP	GO:1903313	positive regulation of mRNA metabolic process	8/168	78/18670	4.9936e-07	1.17501e-05	9.81199e-06	CPEB3/METTL3/NANOS1/PABPC1/RBM24/RBM3/SF3B4/ZFP36	8
BP	GO:0098781	ncRNA transcription	9/168	107/18670	5.2612e-07	1.2195e-05	1.01835e-05	ANG/CD3EAP/INTS3/INTS7/INTS8/NPM3/POLR1E/POLR2K/TCOF1	9
BP	GO:1903312	negative regulation of mRNA metabolic process	8/168	79/18670	5.51408e-07	1.25932e-05	1.0516e-05	BARD1/DHX34/IGF2BP1/LARP1/PABPC1/RBM24/SFSWAP/ZFP36	8
BP	GO:0006406	mRNA export from nucleus	9/168	111/18670	7.19065e-07	1.5953e-05	1.33216e-05	AKAP8L/CASC3/CPSF1/CPSF4/DDX39A/DDX39B/SMG5/THOC5/UPF3B	9
BP	GO:0071427	mRNA-containing ribonucleoprotein complex export from nucleus	9/168	111/18670	7.19065e-07	1.5953e-05	1.33216e-05	AKAP8L/CASC3/CPSF1/CPSF4/DDX39A/DDX39B/SMG5/THOC5/UPF3B	9
BP	GO:0030488	tRNA methylation	6/168	39/18670	1.23842e-06	2.70882e-05	2.26202e-05	GTPBP3/TARBP1/TRMT1/TRMT6/TRMT61A/WDR4	6
BP	GO:0000469	cleavage involved in rRNA processing	5/168	22/18670	1.29311e-06	2.75096e-05	2.2972e-05	BOP1/NHP2/RCL1/RPS21/RRS1	5
BP	GO:0016556	mRNA modification	5/168	22/18670	1.29311e-06	2.75096e-05	2.2972e-05	METTL3/PUS1/PUS7/TRMT6/TRMT61A	5
BP	GO:0006413	translational initiation	11/168	193/18670	1.42645e-06	2.99362e-05	2.49984e-05	EIF2D/EIF4E3/LARP1/METTL3/NPM1/PABPC1/PAIP2B/RPL36A/RPL8/RPS21/RPSA	11
BP	GO:0000478	endonucleolytic cleavage involved in rRNA processing	4/168	11/18670	1.98732e-06	4.06092e-05	3.3911e-05	BOP1/RCL1/RPS21/RRS1	4
BP	GO:0000479	endonucleolytic cleavage of tricistronic rRNA transcript (SSU-rRNA, 5.8S rRNA, LSU-rRNA)	4/168	11/18670	1.98732e-06	4.06092e-05	3.3911e-05	BOP1/RCL1/RPS21/RRS1	4
BP	GO:0045727	positive regulation of translation	9/168	127/18670	2.23077e-06	4.4992e-05	3.75709e-05	CPEB3/DDX39B/EIF5A2/LARP1/METTL3/NPM1/PABPC1/RBM3/UPF3B	9
BP	GO:0008334	histone mRNA metabolic process	5/168	25/18670	2.55253e-06	5.08215e-05	4.24388e-05	EXOSC4/LSM11/SNRPB/SNRPE/ZNF473	5
BP	GO:0006305	DNA alkylation	7/168	72/18670	3.79765e-06	7.32875e-05	6.11992e-05	BRCA1/DNMT1/DNMT3B/EZH2/MAEL/PARP1/TDRKH	7
BP	GO:0006306	DNA methylation	7/168	72/18670	3.79765e-06	7.32875e-05	6.11992e-05	BRCA1/DNMT1/DNMT3B/EZH2/MAEL/PARP1/TDRKH	7
BP	GO:0000460	maturation of 5.8S rRNA	5/168	27/18670	3.82246e-06	7.32875e-05	6.11992e-05	BOP1/EXOSC4/RCL1/RPS21/RRS1	5
BP	GO:0043628	ncRNA 3'-end processing	6/168	48/18670	4.35646e-06	8.1513e-05	6.80679e-05	EXOSC4/FBL/INTS7/INTS8/PTCD1/RPS21	6
BP	GO:0061014	positive regulation of mRNA catabolic process	6/168	48/18670	4.35646e-06	8.1513e-05	6.80679e-05	CPEB3/METTL3/NANOS1/PABPC1/RBM24/ZFP36	6
BP	GO:0006415	translational termination	8/168	104/18670	4.50023e-06	8.32008e-05	6.94773e-05	DAP3/EIF5A2/MRPL13/MRPL24/MRPL53/MRPS12/MRPS21/MRPS23	8
BP	GO:1902373	negative regulation of mRNA catabolic process	6/168	52/18670	7.01575e-06	0.000128182	0.000107039	DHX34/IGF2BP1/LARP1/PABPC1/RBM24/ZFP36	6
BP	GO:0006304	DNA modification	8/168	116/18670	1.01313e-05	0.000182952	0.000152775	BRCA1/DNMT1/DNMT3B/EXOSC4/EZH2/MAEL/PARP1/TDRKH	8
BP	GO:0034250	positive regulation of cellular amide metabolic process	9/168	153/18670	1.02744e-05	0.000183403	0.000153152	CPEB3/DDX39B/EIF5A2/LARP1/METTL3/NPM1/PABPC1/RBM3/UPF3B	9
BP	GO:0009303	rRNA transcription	5/168	33/18670	1.07577e-05	0.000187715	0.000156753	ANG/CD3EAP/NPM3/POLR1E/TCOF1	5
BP	GO:0043928	exonucleolytic nuclear-transcribed mRNA catabolic process involved in deadenylation-dependent decay	5/168	33/18670	1.07577e-05	0.000187715	0.000156753	CNOT6/EDC3/EXOSC4/LSM2/LSM4	5
BP	GO:0000291	nuclear-transcribed mRNA catabolic process, exonucleolytic	5/168	35/18670	1.45021e-05	0.000247586	0.000206748	CNOT6/EDC3/EXOSC4/LSM2/LSM4	5
BP	GO:0070125	mitochondrial translational elongation	7/168	88/18670	1.45076e-05	0.000247586	0.000206748	DAP3/MRPL13/MRPL24/MRPL53/MRPS12/MRPS21/MRPS23	7
BP	GO:1902369	negative regulation of RNA catabolic process	6/168	59/18670	1.47408e-05	0.000248831	0.000207788	DHX34/IGF2BP1/LARP1/PABPC1/RBM24/ZFP36	6
BP	GO:0070126	mitochondrial translational termination	7/168	89/18670	1.5628e-05	0.000260971	0.000217925	DAP3/MRPL13/MRPL24/MRPL53/MRPS12/MRPS21/MRPS23	7
BP	GO:1900153	positive regulation of nuclear-transcribed mRNA catabolic process, deadenylation-dependent decay	4/168	18/18670	1.75422e-05	0.00028982	0.000242016	CPEB3/NANOS1/PABPC1/ZFP36	4
BP	GO:0000289	nuclear-transcribed mRNA poly(A) tail shortening	5/168	37/18670	1.91917e-05	0.000313734	0.000261985	CNOT6/CPEB3/PABPC1/SAMD4B/ZFP36	5
BP	GO:0044728	DNA methylation or demethylation	7/168	94/18670	2.2359e-05	0.000361703	0.000302042	BRCA1/DNMT1/DNMT3B/EZH2/MAEL/PARP1/TDRKH	7
BP	GO:1900151	regulation of nuclear-transcribed mRNA catabolic process, deadenylation-dependent decay	4/168	20/18670	2.73876e-05	0.000438483	0.000366158	CPEB3/NANOS1/PABPC1/ZFP36	4
BP	GO:0043484	regulation of RNA splicing	8/168	135/18670	3.05728e-05	0.000484485	0.000404573	CLK2/FASTK/FUS/MBNL2/RBM24/RBM3/SF3B4/SFSWAP	8
BP	GO:0033962	cytoplasmic mRNA processing body assembly	4/168	21/18670	3.35949e-05	0.000526998	0.000440073	ATXN2L/CNOT6/EDC3/LSM4	4
BP	GO:0000466	maturation of 5.8S rRNA from tricistronic rRNA transcript (SSU-rRNA, 5.8S rRNA, LSU-rRNA)	4/168	22/18670	4.0773e-05	0.000620789	0.000518394	BOP1/RCL1/RPS21/RRS1	4
BP	GO:0002097	tRNA wobble base modification	4/168	22/18670	4.0773e-05	0.000620789	0.000518394	ADAT2/CTU1/GTPBP3/TRMU	4
BP	GO:0006379	mRNA cleavage	4/168	22/18670	4.0773e-05	0.000620789	0.000518394	CPSF1/CPSF4/CSTF2/RNASE4	4
BP	GO:0031503	protein-containing complex localization	11/168	281/18670	4.94144e-05	0.000745053	0.000622161	AKAP8L/CASC3/CPSF1/CPSF4/DDX39A/DDX39B/NPM1/RRS1/SMG5/THOC5/UPF3B	11
BP	GO:0048255	mRNA stabilization	5/168	45/18670	5.07565e-05	0.000757931	0.000632915	IGF2BP1/LARP1/PABPC1/RBM24/ZFP36	5
BP	GO:0043489	RNA stabilization	5/168	50/18670	8.48871e-05	0.00125552	0.00104843	IGF2BP1/LARP1/PABPC1/RBM24/ZFP36	5
BP	GO:0031440	regulation of mRNA 3'-end processing	4/168	28/18670	0.000109421	0.00160311	0.00133869	BARD1/CPEB3/SNRPA/ZC3H3	4
BP	GO:0051573	negative regulation of histone H3-K9 methylation	3/168	11/18670	0.00011199	0.00161771	0.00135088	BRCA1/DNMT1/DNMT3B	3
BP	GO:0006376	mRNA splice site selection	5/168	53/18670	0.0001125	0.00161771	0.00135088	NOL3/PRPF39/SF3A2/SFSWAP/SNRPC	5
BP	GO:2000765	regulation of cytoplasmic translation	4/168	29/18670	0.000126041	0.0017958	0.00149959	CPEB3/METTL3/RBM24/UNK	4
BP	GO:0061157	mRNA destabilization	4/168	30/18670	0.000144417	0.00203859	0.00170234	CPEB3/METTL3/RBM24/ZFP36	4
BP	GO:0001682	tRNA 5'-leader removal	3/168	12/18670	0.000148333	0.00203859	0.00170234	POP1/RPP21/RPP40	3
BP	GO:0060213	positive regulation of nuclear-transcribed mRNA poly(A) tail shortening	3/168	12/18670	0.000148333	0.00203859	0.00170234	CPEB3/PABPC1/ZFP36	3
BP	GO:0098789	pre-mRNA cleavage required for polyadenylation	3/168	12/18670	0.000148333	0.00203859	0.00170234	CPSF1/CPSF4/CSTF2	3
BP	GO:0050779	RNA destabilization	4/168	32/18670	0.000186862	0.00254559	0.00212571	CPEB3/METTL3/RBM24/ZFP36	4
BP	GO:0098787	mRNA cleavage involved in mRNA processing	3/168	13/18670	0.000191559	0.00258688	0.00216019	CPSF1/CPSF4/CSTF2	3
BP	GO:0060211	regulation of nuclear-transcribed mRNA poly(A) tail shortening	3/168	14/18670	0.000242193	0.00321475	0.00268449	CPEB3/PABPC1/ZFP36	3
BP	GO:0080009	mRNA methylation	3/168	14/18670	0.000242193	0.00321475	0.00268449	METTL3/TRMT6/TRMT61A	3
BP	GO:0006360	transcription by RNA polymerase I	5/168	64/18670	0.000276032	0.00363286	0.00303364	CD3EAP/HEATR1/POLR1E/POLR2K/TCOF1	5
BP	GO:0000154	rRNA modification	4/168	36/18670	0.000297642	0.00385199	0.00321662	FBL/MRM1/NHP2/NSUN5	4
BP	GO:0016180	snRNA processing	4/168	36/18670	0.000297642	0.00385199	0.00321662	EXOSC4/INTS3/INTS7/INTS8	4
BP	GO:0016073	snRNA metabolic process	6/168	101/18670	0.000303831	0.00389958	0.00325637	EXOSC4/INTS3/INTS7/INTS8/NHP2/POLR2K	6
BP	GO:0000077	DNA damage checkpoint	7/168	145/18670	0.000343858	0.00437714	0.00365516	BRCA1/CNOT6/DDX39B/INTS7/PCBP4/PRKDC/THOC5	7
BP	GO:0051571	positive regulation of histone H3-K4 methylation	3/168	16/18670	0.000367703	0.00456835	0.00381482	BRCA1/DNMT1/DNMT3B	3
BP	GO:0061158	3'-UTR-mediated mRNA destabilization	3/168	16/18670	0.000367703	0.00456835	0.00381482	CPEB3/RBM24/ZFP36	3
BP	GO:0099116	tRNA 5'-end processing	3/168	16/18670	0.000367703	0.00456835	0.00381482	POP1/RPP21/RPP40	3
BP	GO:0010212	response to ionizing radiation	7/168	147/18670	0.000373598	0.00460474	0.00384521	BRCA1/CLK2/DNMT3B/INTS3/INTS7/PARP1/PRKDC	7
BP	GO:0016246	RNA interference	3/168	17/18670	0.000443552	0.00533982	0.00445905	DROSHA/TERT/XPO5	3
BP	GO:0042790	nucleolar large rRNA transcription by RNA polymerase I	3/168	17/18670	0.000443552	0.00533982	0.00445905	CD3EAP/POLR1E/TCOF1	3
BP	GO:1900363	regulation of mRNA polyadenylation	3/168	17/18670	0.000443552	0.00533982	0.00445905	CPEB3/SNRPA/ZC3H3	3
BP	GO:0002098	tRNA wobble uridine modification	3/168	18/18670	0.000528755	0.00626957	0.00523544	CTU1/GTPBP3/TRMU	3
BP	GO:0006354	DNA-templated transcription, elongation	6/168	112/18670	0.000528856	0.00626957	0.00523544	CD3EAP/DDX39B/EZH2/POLR1E/POLR2K/THOC5	6
BP	GO:0031570	DNA integrity checkpoint	7/168	157/18670	0.000554701	0.00652614	0.0054497	BRCA1/CNOT6/DDX39B/INTS7/PCBP4/PRKDC/THOC5	7
BP	GO:0034471	ncRNA 5'-end processing	3/168	19/18670	0.000623759	0.00728344	0.00608208	POP1/RPP21/RPP40	3
BP	GO:0000723	telomere maintenance	7/168	162/18670	0.00066831	0.00774541	0.00646786	EXO1/NHP2/PARP1/PRIM1/PRKDC/SMG5/TERT	7
BP	GO:0006418	tRNA aminoacylation for protein translation	4/168	45/18670	0.000706972	0.0081328	0.00679134	AARS2/AARSD1/DARS2/EEF1E1	4
BP	GO:0031061	negative regulation of histone methylation	3/168	20/18670	0.000729001	0.00832455	0.00695146	BRCA1/DNMT1/DNMT3B	3
BP	GO:0000075	cell cycle checkpoint	8/168	216/18670	0.000770452	0.00873366	0.0072931	BRCA1/CNOT6/DDX39B/INTS3/INTS7/PCBP4/PRKDC/THOC5	8
BP	GO:0043624	cellular protein complex disassembly	8/168	217/18670	0.000793927	0.00893456	0.00746086	DAP3/EIF5A2/MRPL13/MRPL24/MRPL53/MRPS12/MRPS21/MRPS23	8
BP	GO:0000966	RNA 5'-end processing	3/168	21/18670	0.000844902	0.0094398	0.00788277	POP1/RPP21/RPP40	3
BP	GO:0043039	tRNA aminoacylation	4/168	48/18670	0.000904148	0.0100296	0.00837527	AARS2/AARSD1/DARS2/EEF1E1	4
BP	GO:0043038	amino acid activation	4/168	49/18670	0.000977677	0.0107683	0.00899214	AARS2/AARSD1/DARS2/EEF1E1	4
BP	GO:0032200	telomere organization	7/168	175/18670	0.00105141	0.0114988	0.00960217	EXO1/NHP2/PARP1/PRIM1/PRKDC/SMG5/TERT	7
BP	GO:0051570	regulation of histone H3-K9 methylation	3/168	23/18670	0.0011103	0.012058	0.0100691	BRCA1/DNMT1/DNMT3B	3
BP	GO:0019080	viral gene expression	7/168	191/18670	0.00173941	0.018759	0.0156648	EIF2D/POLR2K/RPL36A/RPL8/RPS21/RPSA/ZFP36	7
BP	GO:0031167	rRNA methylation	3/168	27/18670	0.00178605	0.0189982	0.0158646	FBL/MRM1/NSUN5	3
BP	GO:0051569	regulation of histone H3-K4 methylation	3/168	27/18670	0.00178605	0.0189982	0.0158646	BRCA1/DNMT1/DNMT3B	3
BP	GO:2001022	positive regulation of response to DNA damage stimulus	5/168	97/18670	0.00183933	0.0194319	0.0162267	BRCA1/EEF1E1/FUS/PARP1/PRKDC	5
BP	GO:0048024	regulation of mRNA splicing, via spliceosome	5/168	98/18670	0.00192435	0.0201927	0.016862	MBNL2/RBM24/RBM3/SF3B4/SFSWAP	5
BP	GO:0000395	mRNA 5'-splice site recognition	3/168	29/18670	0.002202	0.0229511	0.0191654	PRPF39/SFSWAP/SNRPC	3
BP	GO:0006362	transcription elongation from RNA polymerase I promoter	3/168	30/18670	0.00243063	0.0249984	0.0208751	CD3EAP/POLR1E/POLR2K	3
BP	GO:0034472	snRNA 3'-end processing	3/168	30/18670	0.00243063	0.0249984	0.0208751	EXOSC4/INTS7/INTS8	3
BP	GO:0042255	ribosome assembly	4/168	63/18670	0.00249352	0.02531	0.0211353	BOP1/NPM1/RPSA/RRS1	4
BP	GO:0045815	positive regulation of gene expression, epigenetic	4/168	63/18670	0.00249352	0.02531	0.0211353	CD3EAP/PABPC1L/POLR1E/POLR2K	4
BP	GO:0006363	termination of RNA polymerase I transcription	3/168	31/18670	0.00267341	0.0264446	0.0220827	CD3EAP/POLR1E/POLR2K	3
BP	GO:0034661	ncRNA catabolic process	3/168	31/18670	0.00267341	0.0264446	0.0220827	DROSHA/EXOSC4/POP1	3
BP	GO:0050685	positive regulation of mRNA processing	3/168	31/18670	0.00267341	0.0264446	0.0220827	CPEB3/RBM3/SF3B4	3
BP	GO:2000781	positive regulation of double-strand break repair	3/168	31/18670	0.00267341	0.0264446	0.0220827	FUS/PARP1/PRKDC	3
BP	GO:0045739	positive regulation of DNA repair	4/168	65/18670	0.00279509	0.0273192	0.0228131	BRCA1/FUS/PARP1/PRKDC	4
BP	GO:0045787	positive regulation of cell cycle	10/168	389/18670	0.00280509	0.0273192	0.0228131	BRCA1/CNOT6/DDX39B/EZH2/LSM11/NPM1/NPM2/PCBP4/TERT/THOC5	10
BP	GO:0060968	regulation of gene silencing	6/168	155/18670	0.0028146	0.0273192	0.0228131	DNMT1/MAEL/POLR2K/TERT/XPO5/ZFP36	6
BP	GO:0072331	signal transduction by p53 class mediator	8/168	267/18670	0.00293335	0.028295	0.0236279	BARD1/BOP1/BRCA1/CNOT6/EEF1E1/EXO1/PCBP4/RRS1	8
BP	GO:0032984	protein-containing complex disassembly	9/168	329/18670	0.00300683	0.0288247	0.0240703	DAP3/EIF2D/EIF5A2/MRPL13/MRPL24/MRPL53/MRPS12/MRPS21/MRPS23	9
BP	GO:2001020	regulation of response to DNA damage stimulus	7/168	214/18670	0.00328853	0.0313318	0.0261638	BRCA1/DDX39B/EEF1E1/FUS/PARP1/PRKDC/THOC5	7
BP	GO:0006260	DNA replication	8/168	274/18670	0.00343262	0.0325052	0.0271437	BARD1/BRCA1/EXO1/IGHMBP2/NPM2/PRIM1/REPIN1/RNASEH2A	8
BP	GO:0010603	regulation of cytoplasmic mRNA processing body assembly	2/168	10/18670	0.00345435	0.0325128	0.02715	ATXN2L/CNOT6	2
BP	GO:0042273	ribosomal large subunit biogenesis	4/168	71/18670	0.00384784	0.0357826	0.0298805	BOP1/NHP2/NPM1/RRS1	4
BP	GO:0042795	snRNA transcription by RNA polymerase II	4/168	71/18670	0.00384784	0.0357826	0.0298805	INTS3/INTS7/INTS8/POLR2K	4
BP	GO:0009301	snRNA transcription	4/168	72/18670	0.00404606	0.0374019	0.0312327	INTS3/INTS7/INTS8/POLR2K	4
BP	GO:0006361	transcription initiation from RNA polymerase I promoter	3/168	36/18670	0.00410932	0.0376287	0.0314221	CD3EAP/POLR1E/POLR2K	3
BP	GO:0060147	regulation of posttranscriptional gene silencing	5/168	117/18670	0.00414328	0.0376287	0.0314221	MAEL/POLR2K/TERT/XPO5/ZFP36	5
BP	GO:0060966	regulation of gene silencing by RNA	5/168	117/18670	0.00414328	0.0376287	0.0314221	MAEL/POLR2K/TERT/XPO5/ZFP36	5
BP	GO:0030422	production of siRNA involved in RNA interference	2/168	11/18670	0.0041971	0.0378959	0.0316452	DROSHA/TERT	2
BP	GO:0072401	signal transduction involved in DNA integrity checkpoint	4/168	73/18670	0.00425107	0.037942	0.0316837	BRCA1/CNOT6/PCBP4/PRKDC	4
BP	GO:0072422	signal transduction involved in DNA damage checkpoint	4/168	73/18670	0.00425107	0.037942	0.0316837	BRCA1/CNOT6/PCBP4/PRKDC	4
BP	GO:0051567	histone H3-K9 methylation	3/168	37/18670	0.00444267	0.0393808	0.0328852	BRCA1/DNMT1/DNMT3B	3
BP	GO:0072395	signal transduction involved in cell cycle checkpoint	4/168	74/18670	0.00446299	0.0393808	0.0328852	BRCA1/CNOT6/PCBP4/PRKDC	4
BP	GO:0051054	positive regulation of DNA metabolic process	7/168	228/18670	0.00464716	0.0407742	0.0340488	BRCA1/DDX39B/DNMT1/FUS/NPM2/PARP1/PRKDC	7
BP	GO:0046825	regulation of protein export from nucleus	3/168	38/18670	0.00479194	0.0418083	0.0349123	AKAP8L/BARD1/XPO5	3
BP	GO:0010826	negative regulation of centrosome duplication	2/168	12/18670	0.00500685	0.043198	0.0360727	BRCA1/NPM1	2
BP	GO:0031126	snoRNA 3'-end processing	2/168	12/18670	0.00500685	0.043198	0.0360727	EXOSC4/FBL	2
BP	GO:0031062	positive regulation of histone methylation	3/168	39/18670	0.00515735	0.0442507	0.0369518	BRCA1/DNMT1/DNMT3B	3
BP	GO:0019083	viral transcription	6/168	177/18670	0.00537966	0.0459045	0.0383328	POLR2K/RPL36A/RPL8/RPS21/RPSA/ZFP36	6
BP	GO:0006446	regulation of translational initiation	4/168	79/18670	0.00562972	0.0473995	0.0395813	LARP1/METTL3/NPM1/PAIP2B	4
BP	GO:0090068	positive regulation of cell cycle process	8/168	298/18670	0.00565986	0.0473995	0.0395813	BRCA1/CNOT6/EZH2/LSM11/NPM1/NPM2/PCBP4/TERT	8
BP	GO:0006479	protein methylation	6/168	179/18670	0.00567696	0.0473995	0.0395813	BRCA1/DNMT1/DNMT3B/EZH2/FBL/SNRPB	6
BP	GO:0008213	protein alkylation	6/168	179/18670	0.00567696	0.0473995	0.0395813	BRCA1/DNMT1/DNMT3B/EZH2/FBL/SNRPB	6
BP	GO:1901796	regulation of signal transduction by p53 class mediator	6/168	180/18670	0.00583003	0.0475797	0.0397317	BARD1/BOP1/BRCA1/EEF1E1/EXO1/RRS1	6
BP	GO:0000054	ribosomal subunit export from nucleus	2/168	13/18670	0.00588236	0.0475797	0.0397317	NPM1/RRS1	2
BP	GO:0007183	SMAD protein complex assembly	2/168	13/18670	0.00588236	0.0475797	0.0397317	PARP1/SMAD6	2
BP	GO:0008298	intracellular mRNA localization	2/168	13/18670	0.00588236	0.0475797	0.0397317	CASC3/ZFP36	2
BP	GO:0033750	ribosome localization	2/168	13/18670	0.00588236	0.0475797	0.0397317	NPM1/RRS1	2
BP	GO:0106074	aminoacyl-tRNA metabolism involved in translational fidelity	2/168	13/18670	0.00588236	0.0475797	0.0397317	AARS2/AARSD1	2
BP	GO:0060249	anatomical structure homeostasis	10/168	437/18670	0.00631152	0.0507865	0.0424095	AZGP1/BARD1/EXO1/NANOS1/NHP2/PARP1/PRIM1/PRKDC/SMG5/TERT	10
BP	GO:0031057	negative regulation of histone modification	3/168	42/18670	0.0063524	0.0508519	0.0424642	BRCA1/DNMT1/DNMT3B	3
BP	GO:0010833	telomere maintenance via telomere lengthening	4/168	82/18670	0.00641913	0.0511226	0.0426902	NHP2/PARP1/SMG5/TERT	4
BP	GO:2000045	regulation of G1/S transition of mitotic cell cycle	6/168	184/18670	0.00647258	0.0512853	0.0428261	CNOT6/EZH2/LSM11/PCBP4/PRKDC/TERT	6
BP	GO:0000959	mitochondrial RNA metabolic process	3/168	43/18670	0.00678429	0.0527123	0.0440177	AARS2/DARS2/PUS1	3
BP	GO:0043144	snoRNA processing	2/168	14/18670	0.00682239	0.0527123	0.0440177	EXOSC4/FBL	2
BP	GO:0046606	negative regulation of centrosome cycle	2/168	14/18670	0.00682239	0.0527123	0.0440177	BRCA1/NPM1	2
BP	GO:0071428	rRNA-containing ribonucleoprotein complex export from nucleus	2/168	14/18670	0.00682239	0.0527123	0.0440177	NPM1/RRS1	2
BP	GO:1902570	protein localization to nucleolus	2/168	14/18670	0.00682239	0.0527123	0.0440177	RRS1/TERT	2
BP	GO:0042770	signal transduction in response to DNA damage	5/168	133/18670	0.00708967	0.0545062	0.0455157	BRCA1/CNOT6/EEF1E1/PCBP4/PRKDC	5
BP	GO:1904874	positive regulation of telomerase RNA localization to Cajal body	2/168	15/18670	0.00782571	0.0598686	0.0499937	NHP2/RUVBL1	2
	ID	Description	GeneRatio	BgRatio	pvalue	p.adjust	qvalue	geneID	Count
CC	GO:0005681	spliceosomal complex	22/174	185/19717	8.81482e-19	1.75415e-16	1.10417e-16	CASC3/DDX39B/DDX41/GPATCH1/LSM2/LSM4/PABPC1/PRPF3/PRPF39/RALY/RBM3/SF3A2/SF3B4/SNRPA/SNRPA1/SNRPB/SNRPC/SNRPD1/SNRPD2/SNRPE/TTF2/WDR83	22
CC	GO:0030532	small nuclear ribonucleoprotein complex	14/174	105/19717	4.682e-13	4.65859e-11	2.93241e-11	DDX39B/LSM11/LSM2/LSM4/PRPF3/PRPF39/SF3A2/SNRPA/SNRPA1/SNRPB/SNRPC/SNRPD1/SNRPD2/SNRPE	14
CC	GO:0005684	U2-type spliceosomal complex	13/174	90/19717	1.14126e-12	7.57039e-11	4.76528e-11	CASC3/LSM2/LSM4/PRPF3/PRPF39/SF3A2/SF3B4/SNRPA1/SNRPB/SNRPC/SNRPD1/SNRPD2/SNRPE	13
CC	GO:0120114	Sm-like protein family complex	14/174	116/19717	1.89981e-12	9.45153e-11	5.94939e-11	DDX39B/LSM11/LSM2/LSM4/PRPF3/PRPF39/SF3A2/SNRPA/SNRPA1/SNRPB/SNRPC/SNRPD1/SNRPD2/SNRPE	14
CC	GO:0097525	spliceosomal snRNP complex	13/174	99/19717	4.01129e-12	1.59649e-10	1.00493e-10	DDX39B/LSM2/LSM4/PRPF3/PRPF39/SF3A2/SNRPA/SNRPA1/SNRPB/SNRPC/SNRPD1/SNRPD2/SNRPE	13
CC	GO:0071013	catalytic step 2 spliceosome	12/174	87/19717	1.52128e-11	4.75555e-10	2.99345e-10	DDX41/GPATCH1/LSM2/PABPC1/RALY/SF3A2/SNRPA1/SNRPB/SNRPD1/SNRPD2/SNRPE/WDR83	12
CC	GO:0071005	U2-type precatalytic spliceosome	10/174	50/19717	1.67281e-11	4.75555e-10	2.99345e-10	LSM2/LSM4/PRPF3/SF3A2/SF3B4/SNRPA1/SNRPB/SNRPD1/SNRPD2/SNRPE	10
CC	GO:0071011	precatalytic spliceosome	10/174	51/19717	2.06508e-11	5.13688e-10	3.23348e-10	LSM2/LSM4/PRPF3/SF3A2/SF3B4/SNRPA1/SNRPB/SNRPD1/SNRPD2/SNRPE	10
CC	GO:0036464	cytoplasmic ribonucleoprotein granule	16/174	212/19717	6.72439e-11	1.48684e-09	9.3591e-10	ATXN2L/BARD1/CASC3/EDC3/IGF2BP1/LARP1/LSM2/LSM4/MAEL/MEX3A/MEX3B/PABPC1/PABPC1L/SAMD4B/TDRKH/ZFP36	16
CC	GO:0035770	ribonucleoprotein granule	16/174	223/19717	1.43073e-10	2.84715e-09	1.79218e-09	ATXN2L/BARD1/CASC3/EDC3/IGF2BP1/LARP1/LSM2/LSM4/MAEL/MEX3A/MEX3B/PABPC1/PABPC1L/SAMD4B/TDRKH/ZFP36	16
CC	GO:0005840	ribosome	17/174	272/19717	3.19964e-10	5.78843e-09	3.6436e-09	DAP3/EIF2D/LARP1/MRPL13/MRPL24/MRPL53/MRPS12/MRPS21/MRPS23/MTG1/RBM3/RPL22L1/RPL36A/RPL39L/RPL8/RPS21/RPSA	17
CC	GO:0044452	nucleolar part	14/174	178/19717	6.3664e-10	1.05576e-08	6.64563e-09	BOP1/CD3EAP/FBL/HEATR1/NHP2/NOP56/POLR1E/POLR2K/POP1/RPP21/RPP40/RRP9/RRS1/TCOF1	14
CC	GO:0030684	preribosome	10/174	76/19717	1.27616e-09	1.9535e-08	1.22966e-08	BOP1/DCAF13/FBL/HEATR1/NOP56/RRP15/RRP9/RRS1/UTP14A/WDR46	10
CC	GO:0044391	ribosomal subunit	14/174	190/19717	1.49828e-09	2.1297e-08	1.34057e-08	DAP3/EIF2D/MRPL13/MRPL24/MRPL53/MRPS12/MRPS21/RBM3/RPL22L1/RPL36A/RPL39L/RPL8/RPS21/RPSA	14
CC	GO:0005697	telomerase holoenzyme complex	6/174	21/19717	2.10632e-08	2.79438e-07	1.75896e-07	LSM11/NHP2/SMG5/SNRPB/SNRPE/TERT	6
CC	GO:0005685	U1 snRNP	7/174	37/19717	3.04188e-08	3.78333e-07	2.38147e-07	PRPF39/SNRPA/SNRPB/SNRPC/SNRPD1/SNRPD2/SNRPE	7
CC	GO:0032040	small-subunit processome	7/174	38/19717	3.70117e-08	4.33255e-07	2.72718e-07	DCAF13/FBL/HEATR1/NOP56/RRP9/UTP14A/WDR46	7
CC	GO:0005687	U4 snRNP	5/174	13/19717	6.14138e-08	6.56762e-07	4.13408e-07	DDX39B/SNRPB/SNRPD1/SNRPD2/SNRPE	5
CC	GO:0034708	methyltransferase complex	10/174	113/19717	6.2706e-08	6.56762e-07	4.13408e-07	EZH2/METTL3/RUVBL1/SNRPB/SNRPD1/SNRPD2/SNRPE/TRMT6/TRMT61A/WDR4	10
CC	GO:0046540	U4/U6 x U5 tri-snRNP complex	7/174	42/19717	7.68053e-08	7.27822e-07	4.58137e-07	LSM2/LSM4/PRPF3/SNRPB/SNRPD1/SNRPD2/SNRPE	7
CC	GO:0097526	spliceosomal tri-snRNP complex	7/174	42/19717	7.68053e-08	7.27822e-07	4.58137e-07	LSM2/LSM4/PRPF3/SNRPB/SNRPD1/SNRPD2/SNRPE	7
CC	GO:0005686	U2 snRNP	6/174	27/19717	1.09964e-07	9.9467e-07	6.26108e-07	SF3A2/SNRPA1/SNRPB/SNRPD1/SNRPD2/SNRPE	6
CC	GO:0005844	polysome	8/174	72/19717	2.31683e-07	2.00457e-06	1.2618e-06	FUS/LARP1/MSI1/MSI2/RPL36A/RPL8/RPS21/UNK	8
CC	GO:1902555	endoribonuclease complex	6/174	31/19717	2.65632e-07	2.20253e-06	1.38641e-06	DROSHA/POP1/RPP21/RPP40/TSEN54/ZFP36	6
CC	GO:1905348	endonuclease complex	6/174	32/19717	3.2455e-07	2.58342e-06	1.62617e-06	DROSHA/POP1/RPP21/RPP40/TSEN54/ZFP36	6
CC	GO:0010494	cytoplasmic stress granule	7/174	66/19717	1.85573e-06	1.42035e-05	8.94058e-06	ATXN2L/CASC3/IGF2BP1/LARP1/PABPC1/PABPC1L/ZFP36	7
CC	GO:0034709	methylosome	4/174	12/19717	2.74449e-06	2.02279e-05	1.27327e-05	SNRPB/SNRPD1/SNRPD2/SNRPE	4
CC	GO:0005689	U12-type spliceosomal complex	5/174	27/19717	3.48523e-06	2.477e-05	1.55918e-05	SF3B4/SNRPB/SNRPD1/SNRPD2/SNRPE	5
CC	GO:0005732	small nucleolar ribonucleoprotein complex	5/174	28/19717	4.21268e-06	2.89077e-05	1.81963e-05	FBL/NHP2/NOP56/POP1/RRP9	5
CC	GO:0071007	U2-type catalytic step 2 spliceosome	5/174	30/19717	6.02176e-06	3.99443e-05	2.51435e-05	SNRPA1/SNRPB/SNRPD1/SNRPD2/SNRPE	5
CC	GO:0000932	P-body	7/174	84/19717	9.4466e-06	5.91929e-05	3.72598e-05	EDC3/LSM2/LSM4/MEX3A/MEX3B/SAMD4B/ZFP36	7
CC	GO:0071004	U2-type prespliceosome	4/174	16/19717	9.81591e-06	5.91929e-05	3.72598e-05	PRPF39/SF3A2/SNRPB/SNRPC	4
CC	GO:0071010	prespliceosome	4/174	16/19717	9.81591e-06	5.91929e-05	3.72598e-05	PRPF39/SF3A2/SNRPB/SNRPC	4
CC	GO:0000313	organellar ribosome	7/174	87/19717	1.19197e-05	6.67366e-05	4.20082e-05	DAP3/MRPL13/MRPL24/MRPL53/MRPS12/MRPS21/MTG1	7
CC	GO:0005761	mitochondrial ribosome	7/174	87/19717	1.19197e-05	6.67366e-05	4.20082e-05	DAP3/MRPL13/MRPL24/MRPL53/MRPS12/MRPS21/MTG1	7
CC	GO:0015934	large ribosomal subunit	8/174	121/19717	1.20729e-05	6.67366e-05	4.20082e-05	MRPL13/MRPL24/MRPL53/RBM3/RPL22L1/RPL36A/RPL39L/RPL8	8
CC	GO:0005847	mRNA cleavage and polyadenylation specificity factor complex	4/174	17/19717	1.27479e-05	6.8563e-05	4.31579e-05	CPSF1/CPSF4/CSTF2/ZC3H3	4
CC	GO:0034719	SMN-Sm protein complex	4/174	18/19717	1.62775e-05	8.52424e-05	5.3657e-05	SNRPB/SNRPD1/SNRPD2/SNRPE	4
CC	GO:0005849	mRNA cleavage factor complex	4/174	20/19717	2.54195e-05	0.000129705	8.16444e-05	CPSF1/CPSF4/CSTF2/ZC3H3	4
CC	GO:0005682	U5 snRNP	4/174	22/19717	3.7853e-05	0.000188319	0.00011854	SNRPB/SNRPD1/SNRPD2/SNRPE	4
CC	GO:0015935	small ribosomal subunit	6/174	72/19717	4.17967e-05	0.000202867	0.000127697	DAP3/EIF2D/MRPS12/MRPS21/RPS21/RPSA	6
CC	GO:0022626	cytosolic ribosome	7/174	112/19717	6.14419e-05	0.000291118	0.000183248	EIF2D/RPL22L1/RPL36A/RPL39L/RPL8/RPS21/RPSA	7
CC	GO:0030681	multimeric ribonuclease P complex	3/174	10/19717	7.74516e-05	0.000358439	0.000225624	POP1/RPP21/RPP40	3
CC	GO:0001650	fibrillar center	7/174	132/19717	0.000172482	0.000766468	0.000482463	CD3EAP/FBL/HEATR1/NOP56/POLR1E/RRS1/TCOF1	7
CC	GO:0042788	polysomal ribosome	4/174	32/19717	0.000173704	0.000766468	0.000482463	LARP1/RPL36A/RPL8/RPS21	4
CC	GO:0005688	U6 snRNP	3/174	13/19717	0.000181025	0.000766468	0.000482463	DDX39B/LSM2/LSM4	3
CC	GO:0005736	RNA polymerase I complex	3/174	13/19717	0.000181025	0.000766468	0.000482463	CD3EAP/POLR1E/POLR2K	3
CC	GO:0016607	nuclear speck	12/174	397/19717	0.000219492	0.000909976	0.000572797	AKAP8L/ATXN2L/BARD1/CASC3/CLK2/DDX39A/DDX39B/METTL3/PRPF3/SF3A2/SNRPA1/TERT	12
CC	GO:0000346	transcription export complex	3/174	14/19717	0.000228903	0.000911033	0.000573462	DDX39A/DDX39B/THOC5	3
CC	GO:0030677	ribonuclease P complex	3/174	14/19717	0.000228903	0.000911033	0.000573462	POP1/RPP21/RPP40	3
CC	GO:0005759	mitochondrial matrix	13/174	469/19717	0.000279189	0.00108939	0.000685728	DAP3/DARS2/FASTK/MRM1/MRPL13/MRPL24/MRPL53/MRPS12/MRPS21/MTG1/PTCD1/PUS1/TERT	13
CC	GO:0030014	CCR4-NOT complex	3/174	17/19717	0.000419369	0.00160489	0.00101022	CNOT6/CPEB3/ZFP36	3
CC	GO:0030880	RNA polymerase complex	6/174	112/19717	0.000478764	0.00179762	0.00113154	CD3EAP/POLR1E/POLR2J3/POLR2K/PRIM1/TERT	6
CC	GO:0015030	Cajal body	5/174	77/19717	0.000597692	0.00220261	0.00138646	FBL/NHP2/PRPF3/SNRPC/ZNF473	5
CC	GO:0030687	preribosome, large subunit precursor	3/174	23/19717	0.00105054	0.00380103	0.00239261	BOP1/RRP15/RRS1	3
CC	GO:0044445	cytosolic part	8/174	247/19717	0.00161167	0.0057272	0.00360506	CTU1/EIF2D/RPL22L1/RPL36A/RPL39L/RPL8/RPS21/RPSA	8
CC	GO:0000314	organellar small ribosomal subunit	3/174	28/19717	0.00188144	0.00634587	0.00399449	DAP3/MRPS12/MRPS21	3
CC	GO:0005763	mitochondrial small ribosomal subunit	3/174	28/19717	0.00188144	0.00634587	0.00399449	DAP3/MRPS12/MRPS21	3
CC	GO:0032039	integrator complex	3/174	28/19717	0.00188144	0.00634587	0.00399449	INTS3/INTS7/INTS8	3
CC	GO:0022625	cytosolic large ribosomal subunit	4/174	63/19717	0.00232717	0.00771844	0.00485847	RPL22L1/RPL36A/RPL39L/RPL8	4
CC	GO:0055029	nuclear DNA-directed RNA polymerase complex	5/174	107/19717	0.00260211	0.00848887	0.00534343	CD3EAP/POLR1E/POLR2J3/POLR2K/PRIM1	5
CC	GO:0000428	DNA-directed RNA polymerase complex	5/174	108/19717	0.0027093	0.00869596	0.00547379	CD3EAP/POLR1E/POLR2J3/POLR2K/PRIM1	5
CC	GO:0000781	chromosome, telomeric region	6/174	161/19717	0.00309388	0.00977272	0.00615157	EZH2/NHP2/PARP1/PRKDC/TERT/THOC5	6
CC	GO:0005845	mRNA cap binding complex	2/174	12/19717	0.00482199	0.0149934	0.00943777	EIF4E3/ZFP36	2
CC	GO:0000784	nuclear chromosome, telomeric region	5/174	125/19717	0.00505868	0.0154873	0.0097487	NHP2/PARP1/PRKDC/TERT/THOC5	5
CC	GO:0034518	RNA cap binding complex	2/174	14/19717	0.00657195	0.0198154	0.0124731	EIF4E3/ZFP36	2
CC	GO:0022627	cytosolic small ribosomal subunit	3/174	44/19717	0.00686144	0.0203795	0.0128282	EIF2D/RPS21/RPSA	3
CC	GO:0005665	RNA polymerase II, core complex	2/174	15/19717	0.00753928	0.0220635	0.0138881	POLR2J3/POLR2K	2
CC	GO:0098798	mitochondrial protein complex	7/174	262/19717	0.00877552	0.0253091	0.0159311	DAP3/MRPL13/MRPL24/MRPL53/MRPS12/MRPS21/MTG1	7
CC	GO:0035145	exon-exon junction complex	2/174	20/19717	0.0132544	0.0361319	0.0227437	CASC3/UPF3B	2
CC	GO:0043186	P granule	2/174	20/19717	0.0132544	0.0361319	0.0227437	MAEL/TDRKH	2
CC	GO:0045495	pole plasm	2/174	20/19717	0.0132544	0.0361319	0.0227437	MAEL/TDRKH	2
CC	GO:0060293	germ plasm	2/174	20/19717	0.0132544	0.0361319	0.0227437	MAEL/TDRKH	2
CC	GO:0000315	organellar large ribosomal subunit	3/174	57/19717	0.0139489	0.037011	0.023297	MRPL13/MRPL24/MRPL53	3
CC	GO:0005762	mitochondrial large ribosomal subunit	3/174	57/19717	0.0139489	0.037011	0.023297	MRPL13/MRPL24/MRPL53	3
CC	GO:0005743	mitochondrial inner membrane	9/174	473/19717	0.0248252	0.0650028	0.0409169	DAP3/EXOG/MRPL13/MRPL24/MRPL53/MRPS12/MRPS21/MRPS23/MTG1	9
CC	GO:0061695	transferase complex, transferring phosphorus-containing groups	6/174	259/19717	0.0276427	0.0714402	0.044969	CD3EAP/POLR1E/POLR2J3/POLR2K/PRIM1/TERT	6
CC	GO:0030686	90S preribosome	2/174	31/19717	0.0304541	0.0776971	0.0489075	BOP1/HEATR1	2
	ID	Description	GeneRatio	BgRatio	pvalue	p.adjust	qvalue	geneID	Count
MF	GO:0140098	catalytic activity, acting on RNA	44/180	386/17697	1.00148e-33	2.53375e-31	1.77105e-31	AARS2/AARSD1/ANG/AZGP1/CD3EAP/CNOT6/DARS2/DDX39A/DDX39B/DDX41/DDX49/DHX34/DHX37/DHX57/DQX1/DROSHA/EDC3/EXO1/EXOG/EXOSC4/FBL/IGHMBP2/METTL3/MRM1/POLR1E/POLR2J3/POLR2K/POP1/PRIM1/PTRH1/PUS1/RCL1/RNASE4/RNASEH2A/RPP21/RPP40/TARBP1/TERT/TRMT1/TRMT6/TRMT61A/TSEN15/TSEN54/WDR4	44
MF	GO:0004540	ribonuclease activity	16/180	114/17697	3.62718e-14	4.58838e-12	3.20719e-12	ANG/AZGP1/CNOT6/DROSHA/EDC3/EXO1/EXOG/EXOSC4/POP1/RCL1/RNASE4/RNASEH2A/RPP21/RPP40/TSEN15/TSEN54	16
MF	GO:0003730	mRNA 3'-UTR binding	14/180	91/17697	4.11542e-13	3.47067e-11	2.42593e-11	CPEB3/CPSF1/EXOSC4/IGF2BP1/IGF2BP2/IGF2BP3/ILF3/LARP1/PABPC1/PABPC1L/PCBP4/RBM24/RBM3/ZFP36	14
MF	GO:0140101	catalytic activity, acting on a tRNA	15/180	122/17697	1.71164e-12	8.89273e-11	6.21585e-11	AARS2/AARSD1/DARS2/POP1/PTRH1/PUS1/RPP21/RPP40/TARBP1/TRMT1/TRMT6/TRMT61A/TSEN15/TSEN54/WDR4	15
MF	GO:0004521	endoribonuclease activity	12/180	64/17697	1.75746e-12	8.89273e-11	6.21585e-11	DROSHA/EDC3/EXO1/EXOG/POP1/RCL1/RNASE4/RNASEH2A/RPP21/RPP40/TSEN15/TSEN54	12
MF	GO:0043021	ribonucleoprotein complex binding	15/180	133/17697	6.12659e-12	2.58338e-10	1.80573e-10	BOP1/CPEB3/EIF5A2/EZH2/IGHMBP2/LARP1/NPM1/RBM3/RPSA/SNRPA/SNRPB/SNRPC/SNRPD1/UNK/XPO5	15
MF	GO:0004518	nuclease activity	16/180	205/17697	3.22206e-10	1.16454e-08	8.13994e-09	ANG/AZGP1/CNOT6/DROSHA/EDC3/EXO1/EXOG/EXOSC4/POP1/RCL1/RNASE4/RNASEH2A/RPP21/RPP40/TSEN15/TSEN54	16
MF	GO:0000049	tRNA binding	10/180	60/17697	4.4789e-10	1.25907e-08	8.80065e-09	AARS2/CTU1/DARS2/IGHMBP2/PTCD1/PUS1/TERT/TRMT1/TRMU/XPO5	10
MF	GO:0045182	translation regulator activity	10/180	60/17697	4.4789e-10	1.25907e-08	8.80065e-09	CPEB3/IGF2BP1/IGF2BP2/IGF2BP3/LARP1/NANOS1/PABPC1/PAIP2B/RBM3/SAMD4B	10
MF	GO:0004519	endonuclease activity	13/180	127/17697	5.59868e-10	1.41647e-08	9.90083e-09	ANG/DROSHA/EDC3/EXO1/EXOG/POP1/RCL1/RNASE4/RNASEH2A/RPP21/RPP40/TSEN15/TSEN54	13
MF	GO:0016891	endoribonuclease activity, producing 5'-phosphomonoesters	7/180	34/17697	4.27497e-08	9.83243e-07	6.87268e-07	DROSHA/EDC3/EXO1/POP1/RNASEH2A/RPP21/RPP40	7
MF	GO:0003724	RNA helicase activity	9/180	78/17697	9.51502e-08	2.00608e-06	1.40221e-06	DDX39A/DDX39B/DDX41/DDX49/DHX34/DHX37/DHX57/DQX1/IGHMBP2	9
MF	GO:0035925	mRNA 3'-UTR AU-rich region binding	6/180	26/17697	1.98042e-07	3.85419e-06	2.69401e-06	CPEB3/CPSF1/EXOSC4/ILF3/RBM24/ZFP36	6
MF	GO:0017091	AU-rich element binding	6/180	28/17697	3.18642e-07	5.74238e-06	4.01381e-06	CPEB3/CPSF1/EXOSC4/ILF3/RBM24/ZFP36	6
MF	GO:0008173	RNA methyltransferase activity	8/180	66/17697	3.40457e-07	5.74238e-06	4.01381e-06	FBL/METTL3/MRM1/TARBP1/TRMT1/TRMT6/TRMT61A/WDR4	8
MF	GO:0016893	endonuclease activity, active with either ribo- or deoxyribonucleic acids and producing 5'-phosphomonoesters	7/180	46/17697	3.83779e-07	6.0685e-06	4.24176e-06	DROSHA/EDC3/EXO1/POP1/RNASEH2A/RPP21/RPP40	7
MF	GO:0008757	S-adenosylmethionine-dependent methyltransferase activity	11/180	155/17697	5.39785e-07	8.03326e-06	5.6151e-06	DNMT1/DNMT3B/EZH2/FBL/METTL3/MRM1/TARBP1/TRMT1/TRMT6/TRMT61A/WDR4	11
MF	GO:0004549	tRNA-specific ribonuclease activity	5/180	17/17697	5.77083e-07	8.11122e-06	5.66959e-06	POP1/RPP21/RPP40/TSEN15/TSEN54	5
MF	GO:0004386	helicase activity	11/180	163/17697	8.91366e-07	1.18692e-05	8.29637e-06	DDX39A/DDX39B/DDX41/DDX49/DHX34/DHX37/DHX57/DQX1/IGHMBP2/RUVBL1/TTF2	11
MF	GO:0003735	structural constituent of ribosome	12/180	202/17697	1.09679e-06	1.38744e-05	9.69796e-06	DAP3/MRPL13/MRPL24/MRPS12/MRPS21/MRPS23/RPL22L1/RPL36A/RPL39L/RPL8/RPS21/RPSA	12
MF	GO:0008168	methyltransferase activity	12/180	215/17697	2.1107e-06	2.54289e-05	1.77743e-05	DNMT1/DNMT3B/EZH2/FBL/METTL3/MRM1/NSUN5/TARBP1/TRMT1/TRMT6/TRMT61A/WDR4	12
MF	GO:0016741	transferase activity, transferring one-carbon groups	12/180	226/17697	3.54148e-06	4.0727e-05	2.84674e-05	DNMT1/DNMT3B/EZH2/FBL/METTL3/MRM1/NSUN5/TARBP1/TRMT1/TRMT6/TRMT61A/WDR4	12
MF	GO:0003727	single-stranded RNA binding	8/180	95/17697	5.60817e-06	5.80826e-05	4.05986e-05	ILF3/MSI1/MSI2/PABPC1/PABPC1L/PUS1/RBM3/SNRPC	8
MF	GO:0030371	translation repressor activity	5/180	26/17697	5.69547e-06	5.80826e-05	4.05986e-05	CPEB3/NANOS1/PAIP2B/RBM3/SAMD4B	5
MF	GO:0034062	5'-3' RNA polymerase activity	6/180	45/17697	5.96896e-06	5.80826e-05	4.05986e-05	CD3EAP/POLR1E/POLR2J3/POLR2K/PRIM1/TERT	6
MF	GO:0097747	RNA polymerase activity	6/180	45/17697	5.96896e-06	5.80826e-05	4.05986e-05	CD3EAP/POLR1E/POLR2J3/POLR2K/PRIM1/TERT	6
MF	GO:0009982	pseudouridine synthase activity	4/180	13/17697	6.88938e-06	6.45561e-05	4.51235e-05	PUS1/PUS7/PUSL1/RPUSD1	4
MF	GO:0017069	snRNA binding	6/180	47/17697	7.73742e-06	6.99131e-05	4.88679e-05	DDX39B/LSM11/LSM2/LSM4/SNRPA/SNRPA1	6
MF	GO:0008266	poly(U) RNA binding	5/180	30/17697	1.19386e-05	0.000104154	7.28016e-05	MSI1/MSI2/PABPC1/PABPC1L/RBM3	5
MF	GO:0008187	poly-pyrimidine tract binding	5/180	33/17697	1.93979e-05	0.000163589	0.000114345	MSI1/MSI2/PABPC1/PABPC1L/RBM3	5
MF	GO:0008175	tRNA methyltransferase activity	5/180	34/17697	2.25559e-05	0.000184085	0.000128672	TARBP1/TRMT1/TRMT6/TRMT61A/WDR4	5
MF	GO:0034458	3'-5' RNA helicase activity	4/180	19/17697	3.56048e-05	0.0002815	0.000196763	DHX34/DHX37/DHX57/DQX1	4
MF	GO:0003899	DNA-directed 5'-3' RNA polymerase activity	5/180	41/17697	5.73488e-05	0.000439674	0.000307324	CD3EAP/POLR1E/POLR2J3/POLR2K/PRIM1	5
MF	GO:0070034	telomerase RNA binding	4/180	22/17697	6.56112e-05	0.000488225	0.00034126	NHP2/SMG5/SNRPB/TERT	4
MF	GO:0070412	R-SMAD binding	4/180	23/17697	7.87954e-05	0.000569578	0.000398124	DROSHA/PARP1/SMAD6/ZC3H3	4
MF	GO:0048027	mRNA 5'-UTR binding	4/180	25/17697	0.000110791	0.000778612	0.000544234	IGF2BP1/IGF2BP2/IGF2BP3/LARP1	4
MF	GO:0033204	ribonuclease P RNA binding	3/180	10/17697	0.000117825	0.000805671	0.000563149	POP1/RPP21/RPP40	3
MF	GO:0016866	intramolecular transferase activity	4/180	27/17697	0.000151284	0.00100723	0.000704037	PUS1/PUS7/PUSL1/RPUSD1	4
MF	GO:0090079	translation regulator activity, nucleic acid binding	4/180	28/17697	0.000175103	0.00113593	0.00079399	CPEB3/LARP1/PABPC1/PAIP2B	4
MF	GO:0001054	RNA polymerase I activity	3/180	12/17697	0.000212795	0.0013131	0.000917833	CD3EAP/POLR1E/POLR2K	3
MF	GO:0004526	ribonuclease P activity	3/180	12/17697	0.000212795	0.0013131	0.000917833	POP1/RPP21/RPP40	3
MF	GO:0008135	translation factor activity, RNA binding	6/180	85/17697	0.000229063	0.00137983	0.000964474	CPEB3/EEF1A2/EIF2D/EIF4E3/EIF5A2/GTPBP2	6
MF	GO:0016423	tRNA (guanine) methyltransferase activity	3/180	13/17697	0.000274567	0.00157876	0.00110352	TARBP1/TRMT1/WDR4	3
MF	GO:0017070	U6 snRNA binding	3/180	13/17697	0.000274567	0.00157876	0.00110352	DDX39B/LSM2/LSM4	3
MF	GO:0140097	catalytic activity, acting on DNA	9/180	213/17697	0.000338638	0.0019039	0.00133079	DNMT1/DNMT3B/DQX1/EXO1/EXOG/IGHMBP2/RUVBL1/TERT/TOP3B	9
MF	GO:0019843	rRNA binding	5/180	63/17697	0.000449108	0.00247009	0.00172655	ANG/NOL12/RBM3/RPL8/RRS1	5
MF	GO:0016779	nucleotidyltransferase activity	7/180	137/17697	0.000507768	0.0027333	0.00191053	CD3EAP/CTU1/POLR1E/POLR2J3/POLR2K/PRIM1/TERT	7
MF	GO:0003746	translation elongation factor activity	3/180	20/17697	0.00103856	0.00547408	0.00382628	EEF1A2/EIF5A2/GTPBP2	3
MF	GO:0016894	endonuclease activity, active with either ribo- or deoxyribonucleic acids and producing 3'-phosphomonoesters	3/180	21/17697	0.00120264	0.00620953	0.00434034	RNASE4/TSEN15/TSEN54	3
MF	GO:0030515	snoRNA binding	3/180	26/17697	0.00226494	0.0114606	0.00801073	NHP2/NOP56/RRP9	3
MF	GO:0043022	ribosome binding	4/180	57/17697	0.0026866	0.0133276	0.00931576	CPEB3/EIF5A2/IGHMBP2/RPSA	4
MF	GO:0001055	RNA polymerase II activity	2/180	11/17697	0.00532719	0.0245051	0.0171286	POLR2J3/POLR2K	2
MF	GO:0001094	TFIID-class transcription factor complex binding	2/180	11/17697	0.00532719	0.0245051	0.0171286	FBL/RUVBL1	2
MF	GO:0004523	RNA-DNA hybrid ribonuclease activity	2/180	11/17697	0.00532719	0.0245051	0.0171286	EXO1/RNASEH2A	2
MF	GO:0008174	mRNA methyltransferase activity	2/180	11/17697	0.00532719	0.0245051	0.0171286	METTL3/TRMT61A	2
MF	GO:0000340	RNA 7-methylguanosine cap binding	2/180	12/17697	0.00635006	0.0286887	0.0200528	EIF4E3/LARP1	2
MF	GO:0002161	aminoacyl-tRNA editing activity	2/180	13/17697	0.0074547	0.0319668	0.0223441	AARS2/AARSD1	2
MF	GO:0008494	translation activator activity	2/180	13/17697	0.0074547	0.0319668	0.0223441	LARP1/PABPC1	2
MF	GO:0043023	ribosomal large subunit binding	2/180	13/17697	0.0074547	0.0319668	0.0223441	NPM1/RBM3	2
MF	GO:0004812	aminoacyl-tRNA ligase activity	3/180	41/17697	0.00830769	0.0344565	0.0240844	AARS2/AARSD1/DARS2	3
MF	GO:0016875	ligase activity, forming carbon-oxygen bonds	3/180	41/17697	0.00830769	0.0344565	0.0240844	AARS2/AARSD1/DARS2	3
MF	GO:0030331	estrogen receptor binding	3/180	42/17697	0.00888083	0.0360777	0.0252176	DCAF13/FUS/PARP1	3
MF	GO:0046332	SMAD binding	4/180	80/17697	0.00898378	0.0360777	0.0252176	DROSHA/PARP1/SMAD6/ZC3H3	4
MF	GO:0004527	exonuclease activity	4/180	81/17697	0.00937705	0.0370687	0.0259103	CNOT6/EXO1/EXOG/EXOSC4	4
MF	GO:0000900	translation repressor activity, mRNA regulatory element binding	2/180	15/17697	0.00990227	0.0385427	0.0269406	CPEB3/PAIP2B	2
MF	GO:0008409	5'-3' exonuclease activity	2/180	17/17697	0.0126562	0.0477914	0.0334053	EXO1/EXOG	2
MF	GO:0043024	ribosomal small subunit binding	2/180	17/17697	0.0126562	0.0477914	0.0334053	LARP1/NPM1	2
MF	GO:0035258	steroid hormone receptor binding	4/180	92/17697	0.0144561	0.0537851	0.0375947	BRCA1/DCAF13/FUS/PARP1	4
MF	GO:0000339	RNA cap binding	2/180	19/17697	0.0157033	0.0575787	0.0402464	EIF4E3/LARP1	2
MF	GO:0001091	RNA polymerase II basal transcription factor binding	2/180	20/17697	0.0173327	0.0626453	0.0437878	FBL/RUVBL1	2
