# Supplementary material for: A Prognostic Model Based on RNA Binding Protein Predicts Clinical Outcomes in Hepatocellular Carcinoma Patients
Source: Front Oncol. 2021 Feb 12;10:613102. doi: 10.3389/fonc.2020.613102 (PMC7907500; doi:10.3389/fonc.2020.613102)
Supplement: Supplementary file 11 [file Table_10.xlsx]

## Sheet: trainRisk退修
id	futime	fustat	NHP2	SMG5	UPF3B	riskScore	risk
TCGA-2Y-A9GS	1.98356	1	5.43117	5.11915	2.85704	1.65221	high
TCGA-2Y-A9GT	4.44932	1	3.95355	4.43633	2.64626	0.593524	low
TCGA-2Y-A9GU	5.31233	0	3.67783	4.804	1.87254	0.434284	low
TCGA-2Y-A9GV	6.93699	1	4.17501	4.14684	2.25527	0.474949	low
TCGA-2Y-A9GW	3.48219	1	4.70371	4.87718	3.0428	1.19361	high
TCGA-2Y-A9GX	6.69041	0	4.26416	5.0701	2.30229	0.765565	low
TCGA-2Y-A9GY	2.07397	1	5.35964	5.24885	3.61085	2.42487	high
TCGA-2Y-A9GZ	2.32329	1	5.09581	4.66669	2.29934	0.900415	low
TCGA-2Y-A9H0	10.0685	0	5.13697	4.53225	3.52727	1.53596	high
TCGA-2Y-A9H1	3.36712	1	5.27015	4.90534	1.50726	0.743099	low
TCGA-2Y-A9H2	4.74247	0	5.15055	5.6219	3.48438	2.47973	high
TCGA-2Y-A9H3	4.15342	0	4.80592	4.27176	1.87204	0.545768	low
TCGA-2Y-A9H4	3.97808	0	5.9004	4.19091	1.70099	0.765772	low
TCGA-2Y-A9H5	1.52055	1	4.2578	4.69959	2.40691	0.678162	low
TCGA-2Y-A9H6	0.978082	0	4.99858	4.42909	2.11351	0.711454	low
TCGA-2Y-A9H7	3.2	0	4.89365	5.29491	2.4324	1.17122	high
TCGA-2Y-A9H8	1.73425	1	4.85318	5.4298	2.71899	1.40095	high
TCGA-2Y-A9H9	1.90959	0	5.58805	4.46572	2.10819	0.922312	low
TCGA-2Y-A9HA	0.0986301	1	5.82824	6.00105	2.66824	2.65928	high
TCGA-2Y-A9HB	0.712329	0	5.03655	5.02653	2.31964	1.04389	high
TCGA-3K-AAZ8	1.08493	0	5.50619	4.19063	1.88957	0.710043	low
TCGA-4R-AA8I	0.717808	1	5.09538	4.81455	2.69091	1.15737	high
TCGA-5C-A9VG	0.89863	0	5.80475	5.69733	2.51743	2.13775	high
TCGA-5C-A9VH	0.882192	0	4.95319	4.95104	2.54776	1.08479	high
TCGA-5C-AAPD	0.0547945	0	4.98665	5.16266	3.6846	2.06703	high
TCGA-5R-AA1C	1.42466	0	5.31086	4.88176	2.93372	1.46313	high
TCGA-5R-AA1D	1.23014	0	4.83757	3.11169	2.37773	0.414852	low
TCGA-5R-AAAM	0.126027	1	4.78244	4.37379	2.30831	0.695004	low
TCGA-BC-4072	4.08219	1	5.00904	4.45692	3.09656	1.14923	high
TCGA-BC-4073	2.32603	0	4.61952	4.06986	2.52372	0.62627	low
TCGA-BC-A10Q	3.10959	1	5.10873	4.52142	2.74207	1.04396	high
TCGA-BC-A10R	0.843836	1	3.99747	4.68549	1.94512	0.486524	low
TCGA-BC-A10S	3.89863	1	4.88465	4.29076	2.11712	0.638366	low
TCGA-BC-A10T	2.29315	1	5.43466	3.51238	2.30671	0.61686	low
TCGA-BC-A10U	2.29315	1	4.86955	4.62569	3.64932	1.51823	high
TCGA-BC-A10W	0.249315	1	5.15682	6.2433	2.85433	2.44912	high
TCGA-BC-A10X	2.10959	1	4.03883	2.71953	1.81882	0.19146	low
TCGA-BC-A10Y	1.94795	1	5.43238	4.43269	2.53787	1.0424	high
TCGA-BC-A10Z	0.0931507	1	5.1333	5.2408	2.99459	1.64525	high
TCGA-BC-A110	5.79726	1	4.44663	2.9586	1.91096	0.26405	low
TCGA-BC-A112	0.419178	1	5.65905	5.00541	3.01277	1.85666	high
TCGA-BC-A216	3.70137	0	4.81608	4.76034	3.14203	1.24304	high
TCGA-BC-A217	3.8274	1	5.4559	4.11279	3.04843	1.15799	high
TCGA-BC-A3KF	0.0219178	0	4.85525	4.586	2.50596	0.865544	low
TCGA-BC-A3KG	1.86301	0	4.58613	5.08531	3.57122	1.60149	high
TCGA-BC-A5W4	1.49863	1	5.65195	4.78643	2.51732	1.32778	high
TCGA-BC-A69H	1.21644	0	6.40135	5.58148	1.83361	1.88507	high
TCGA-BC-A69I	1.06027	0	4.89841	3.86139	2.52578	0.640647	low
TCGA-BC-A8YO	1.53973	0	5.02989	4.93622	3.06064	1.41617	high
TCGA-BD-A2L6	3.73425	0	4.75472	4.32522	2.58589	0.765853	low
TCGA-BD-A3EP	1.12055	0	4.98401	4.94034	2.73345	1.19333	high
TCGA-BD-A3ER	3.05479	0	4.13287	4.73656	2.32526	0.629975	low
TCGA-BW-A5NO	0.0547945	0	5.29929	5.19594	3.57146	2.2663	high
TCGA-CC-5258	0.353425	1	5.19492	5.17189	3.54144	2.11629	high
TCGA-CC-5259	0.684932	0	4.01473	3.99735	2.08224	0.38273	low
TCGA-CC-5260	0.238356	1	5.54006	4.89804	2.3753	1.24686	high
TCGA-CC-5261	0.265753	1	4.85052	5.68853	2.86899	1.68845	high
TCGA-CC-5262	0.282192	1	5.43021	5.09942	2.84409	1.62691	high
TCGA-CC-5263	0.353425	1	4.97382	4.54778	3.12407	1.19546	high
TCGA-CC-5264	0.279452	1	4.46865	5.34686	4.32078	2.44287	high
TCGA-CC-A123	0.6	0	4.47095	4.87256	1.40767	0.500843	low
TCGA-CC-A1HT	0.276712	1	6.14709	5.94514	3.37124	4.12192	high
TCGA-CC-A3M9	0.821918	1	5.66239	4.62029	4.02474	2.51415	high
TCGA-CC-A3MA	0.830137	1	5.62655	5.1081	3.13287	2.03047	high
TCGA-CC-A3MB	0.863014	1	4.8853	5.5219	3.01484	1.70139	high
TCGA-CC-A3MC	0.994521	0	5.63864	5.94443	2.55926	2.27544	high
TCGA-CC-A5UC	0.950685	1	5.83718	5.06572	2.32611	1.48761	high
TCGA-CC-A5UD	0.832877	1	5.60392	5.93019	2.8098	2.50717	high
TCGA-CC-A5UE	0.745205	1	6.17116	5.19119	3.414	3.0192	high
TCGA-CC-A7IE	0.594521	1	4.85076	4.83252	2.62383	1.02107	high
TCGA-CC-A7IF	1.77808	1	4.9212	4.1628	2.31925	0.672695	low
TCGA-CC-A7IG	0.819178	1	5.89817	5.61628	2.49373	2.11869	high
TCGA-CC-A7IH	1	0	4.66941	5.04075	2.77569	1.1175	high
TCGA-CC-A7II	1.09315	0	6.28664	5.38414	3.08675	2.96384	high
TCGA-CC-A7IJ	1.04658	0	5.37521	4.58987	4.11005	2.29034	high
TCGA-CC-A7IK	0.717808	1	5.4792	4.90356	2.31868	1.18667	high
TCGA-CC-A7IL	0.761644	1	6.23172	4.49001	1.54953	0.937354	low
TCGA-CC-A8HS	0.821918	1	4.35896	5.6599	2.79265	1.31024	high
TCGA-CC-A8HT	0.383562	1	5.07292	5.49897	3.57523	2.37	high
TCGA-CC-A8HU	0.942466	1	5.32633	5.90112	3.97696	3.81752	high
TCGA-CC-A8HV	0.764384	1	4.82995	5.52504	3.43223	2.02633	high
TCGA-CC-A9FS	0.578082	0	5.0473	4.3488	3.28679	1.21601	high
TCGA-CC-A9FW	0.679452	0	6.10337	5.24203	3.03616	2.5143	high
TCGA-DD-A113	6.64384	0	4.75859	4.46492	2.3093	0.717466	low
TCGA-DD-A114	3.14795	1	5.1552	5.02266	3.46351	1.87547	high
TCGA-DD-A115	6.96438	1	5.61148	3.61038	1.92502	0.580014	low
TCGA-DD-A116	4.44384	1	5.77929	3.91505	2.1433	0.791273	low
TCGA-DD-A118	9.41644	0	5.26863	4.6979	2.0957	0.891711	low
TCGA-DD-A119	0.610959	1	6.05089	4.35147	1.74438	0.894886	low
TCGA-DD-A11A	0.216438	0	4.17153	4.22817	2.03728	0.444085	low
TCGA-DD-A11B	0.0383562	1	4.53311	5.21602	2.4	0.957839	low
TCGA-DD-A11C	1.8137	0	4.82939	3.78355	2.07076	0.485103	low
TCGA-DD-A11D	4.27397	1	4.9263	4.75756	1.82799	0.700382	low
TCGA-DD-A1EA	6.61644	0	5.44478	4.66099	2.44048	1.10989	high
TCGA-DD-A1EB	5.52603	0	4.41873	3.79153	1.89176	0.377183	low
TCGA-DD-A1EC	1.64932	0	4.77935	4.59179	2.1901	0.72469	low
TCGA-DD-A1ED	6.30411	0	3.95847	3.61343	2.11456	0.319011	low
TCGA-DD-A1EE	0.956164	1	5.26235	5.34798	2.81087	1.6715	high
TCGA-DD-A1EF	1.07945	1	4.6381	5.70721	2.35199	1.22205	high
TCGA-DD-A1EG	3.7589	1	5.36276	5.66844	2.37305	1.63994	high
TCGA-DD-A1EH	4.09589	0	4.74425	5.10158	2.69674	1.14186	high
TCGA-DD-A1EI	0.50137	0	5.27724	5.45868	2.44533	1.48892	high
TCGA-DD-A1EJ	2.75342	1	5.42427	5.18589	2.8958	1.72929	high
TCGA-DD-A1EK	1.52877	1	4.39553	4.59603	2.20568	0.623375	low
TCGA-DD-A1EL	1.13699	1	6.04957	5.38167	3.63419	3.4703	high
TCGA-DD-A39V	1.76164	1	6.35332	4.74627	2.4042	1.65562	high
TCGA-DD-A39W	2.26575	1	5.19059	4.79256	2.25391	0.970641	low
TCGA-DD-A39X	4.6411	1	6.16211	5.74838	1.9466	1.94077	high
TCGA-DD-A39Y	0.468493	1	6.49791	5.72003	2.44928	2.79165	high
TCGA-DD-A39Z	1.64658	1	5.29689	4.9365	2.57929	1.26209	high
TCGA-DD-A3A1	0.638356	1	5.52949	4.8024	2.23946	1.11516	high
TCGA-DD-A3A2	5.83836	1	4.28244	3.52594	2.10001	0.348512	low
TCGA-DD-A3A3	1.46575	1	5.98062	5.02171	1.53073	1.06471	high
TCGA-DD-A3A4	1.67671	1	4.39879	3.80093	1.7946	0.358872	low
TCGA-DD-A3A5	8.56164	1	5.49206	4.09893	1.98496	0.708251	low
TCGA-DD-A3A6	8.92603	1	4.16732	3.81676	1.9961	0.360884	low
TCGA-DD-A3A7	1.14795	1	4.87525	5.58896	1.90509	1.03608	high
TCGA-DD-A3A8	0.030137	1	5.42064	4.48438	1.77442	0.741416	low
TCGA-DD-A3A9	2.55068	1	5.64146	5.09391	1.61415	0.993433	low
TCGA-DD-A4NA	2.76164	0	4.53853	4.86752	2.99236	1.08338	high
TCGA-DD-A4NB	2.70959	0	4.47948	4.24657	2.31401	0.579876	low
TCGA-DD-A4ND	7.52329	0	4.45728	4.11218	2.30226	0.53763	low
TCGA-DD-A4NE	1.80822	1	4.55204	4.72575	2.75927	0.915597	low
TCGA-DD-A4NF	2.58082	0	4.6073	4.76086	3.21599	1.18016	high
TCGA-DD-A4NG	2.19726	1	4.66919	4.4786	2.28338	0.68711	low
TCGA-DD-A4NH	2.51233	0	3.81466	5.40412	3.28661	1.17365	high
TCGA-DD-A4NI	2.23562	0	4.05821	3.65417	1.90618	0.307096	low
TCGA-DD-A4NJ	2.54247	0	4.89356	4.97469	3.25901	1.49474	high
TCGA-DD-A4NK	3.31507	1	5.02482	4.92495	2.21833	0.945905	low
TCGA-DD-A4NL	4.68767	0	3.96171	2.73823	1.81645	0.186777	low
TCGA-DD-A4NN	2.46301	1	5.4545	5.76229	2.65925	2.03409	high
TCGA-DD-A4NO	6.15068	0	5.04543	4.72329	2.38656	0.942517	low
TCGA-DD-A4NP	9.06301	0	4.3309	3.3586	2.13346	0.334891	low
TCGA-DD-A4NQ	1.02192	1	5.1107	5.01088	2.76055	1.3155	high
TCGA-DD-A4NR	0.0246575	1	5.46314	5.18014	2.42608	1.40532	high
TCGA-DD-A4NS	6.72877	1	4.72717	4.20053	2.18621	0.59287	low
TCGA-DD-A4NV	6.56986	0	5.02552	4.03532	2.50426	0.723468	low
TCGA-DD-A73A	1.99452	0	4.8882	4.60121	1.84732	0.6481	low
TCGA-DD-A73B	0.775342	1	4.76134	3.88156	2.56449	0.621875	low
TCGA-DD-A73C	1.92055	0	4.56262	4.13535	2.38625	0.590552	low
TCGA-DD-A73D	1.89863	0	5.21224	4.71794	2.17762	0.913499	low
TCGA-DD-A73E	0.120548	0	5.15408	4.24338	2.03275	0.671794	low
TCGA-DD-A73F	2.9726	0	4.36059	3.78039	1.98172	0.382144	low
TCGA-DD-A73G	9.52877	0	5.00068	5.02068	1.39237	0.663009	low
TCGA-DD-AA3A	1.12329	1	6.03279	5.19704	3.18369	2.5642	high
TCGA-DD-AAC8	0.0438356	1	6.07292	5.47459	2.50341	2.14674	high
TCGA-DD-AAC9	0.950685	0	4.75146	4.40455	1.71584	0.52645	low
TCGA-DD-AACA	6.30411	0	5.59195	4.57881	2.10179	0.969435	low
TCGA-DD-AACB	6.36712	0	5.48116	4.83582	2.73002	1.39771	high
TCGA-DD-AACC	4.61644	1	5.01902	4.76808	2.30776	0.916684	low
TCGA-DD-AACD	1.04384	1	5.40069	3.00874	2.17738	0.455563	low
TCGA-DD-AACE	5.98356	0	5.03267	5.03348	1.9237	0.867769	low
TCGA-DD-AACF	1	1	5.6239	4.06279	2.48402	0.930917	low
TCGA-DD-AACG	1.28493	1	5.74369	5.18306	2.31484	1.50091	high
TCGA-DD-AACH	0.534247	1	5.57069	6.01185	3.01744	2.82925	high
TCGA-DD-AACI	4.43288	0	4.8952	4.81298	3.43266	1.50848	high
TCGA-DD-AACJ	5.7589	0	5.96269	5.11223	1.93886	1.33413	high
TCGA-DD-AACK	0.0246575	0	4.94	4.85985	2.46381	0.995104	low
TCGA-DD-AACL	0.293151	1	5.86169	5.46032	3.37374	2.94192	high
TCGA-DD-AACN	3.56712	0	5.24433	4.74646	2.75656	1.2315	high
TCGA-DD-AACO	5.13973	0	3.87853	4.78058	2.23609	0.554318	low
TCGA-DD-AACP	1.13699	0	5.87182	4.96523	3.22027	2.19642	high
TCGA-DD-AACQ	1.18356	1	4.87884	5.68662	2.30064	1.30643	high
TCGA-DD-AACS	4.94247	0	4.67975	5.11836	3.11875	1.36613	high
TCGA-DD-AACT	4.27945	0	5.66234	4.968	1.74468	1.00653	low
TCGA-DD-AACU	4.29315	0	5.63969	5.29886	2.30307	1.50632	high
TCGA-DD-AACV	4.19452	0	5.43485	3.64569	2.41838	0.690661	low
TCGA-DD-AACW	3.90137	0	5.20749	5.35389	2.51066	1.42232	high
TCGA-DD-AACX	0.465753	0	5.08036	5.47339	2.20667	1.2342	high
TCGA-DD-AACY	3.9726	0	4.75641	3.80609	2.54452	0.594138	low
TCGA-DD-AACZ	0.468493	1	5.65279	5.17996	3.44825	2.45996	high
TCGA-DD-AAD0	0.375342	0	4.8599	5.11721	2.11302	0.916887	low
TCGA-DD-AAD1	1.54521	0	5.13521	5.08619	2.48539	1.2081	high
TCGA-DD-AAD2	1.80274	0	5.65056	4.45154	1.8792	0.844496	low
TCGA-DD-AAD3	3.54795	0	4.79492	4.51676	2.0061	0.646558	low
TCGA-DD-AAD5	3.68493	0	5.74977	4.65256	2.50575	1.29456	high
TCGA-DD-AAD6	1.8411	0	4.44891	4.37982	2.53622	0.675191	low
TCGA-DD-AAD8	3.33973	0	4.18801	4.13998	3.08299	0.702748	low
TCGA-DD-AADA	3.37808	0	3.9951	4.18493	2.45455	0.492408	low
TCGA-DD-AADB	3.40274	0	4.68068	5.66832	2.45756	1.28444	high
TCGA-DD-AADC	1.16438	1	6.30827	4.50379	3.02006	1.94525	high
TCGA-DD-AADD	3.3726	0	5.28077	6.29987	2.77172	2.54492	high
TCGA-DD-AADF	0.315068	1	5.8991	4.56746	3.24883	1.88038	high
TCGA-DD-AADG	3.13699	0	5.85102	4.97512	2.15577	1.32544	high
TCGA-DD-AADI	2.9726	0	5.79272	5.03351	2.31642	1.43262	high
TCGA-DD-AADJ	2.92055	0	4.91992	4.38332	1.91614	0.614585	low
TCGA-DD-AADK	2.87397	0	5.33492	5.3107	2.12846	1.22869	high
TCGA-DD-AADL	1.74247	0	5.20287	5.28961	2.59358	1.43372	high
TCGA-DD-AADM	0.0328767	1	6.1797	4.18137	1.86539	0.925411	low
TCGA-DD-AADN	2.46027	0	5.99791	4.77077	1.44161	0.917881	low
TCGA-DD-AADO	1.2411	0	5.14266	5.20101	1.74843	0.902469	low
TCGA-DD-AADP	1.25479	0	4.96071	4.05402	2.17681	0.608777	low
TCGA-DD-AADQ	1.19452	0	5.41207	3.22521	2.37193	0.553275	low
TCGA-DD-AADR	5.55616	0	5.59929	3.70822	2.04125	0.637135	low
TCGA-DD-AADS	1.29863	0	4.10391	3.54534	1.19186	0.212892	low
TCGA-DD-AADU	1.51781	0	5.46506	4.31402	1.86015	0.727957	low
TCGA-DD-AADV	1.5726	0	5.59092	4.40024	2.15971	0.918428	low
TCGA-DD-AADW	1.60822	0	5.12706	5.3301	3.2256	1.90491	high
TCGA-DD-AADY	1.52055	0	5.17578	4.51156	2.31703	0.875	low
TCGA-DD-AAE0	1.52055	0	5.73376	5.11755	2.30573	1.44482	high
TCGA-DD-AAE1	1.51233	0	4.96806	5.19567	2.16569	1.01877	high
TCGA-DD-AAE2	1.74795	0	4.99003	4.00627	2.22769	0.617685	low
TCGA-DD-AAE3	1.55068	0	6.04169	2.68385	1.45652	0.365814	low
TCGA-DD-AAE4	1.66575	0	5.0493	3.28639	1.84967	0.382505	low
TCGA-DD-AAE6	0.386301	0	5.16859	5.71736	2.27466	1.47648	high
TCGA-DD-AAE7	1.76438	0	4.21621	4.11234	2.38265	0.505062	low
TCGA-DD-AAE9	1.97808	0	4.71602	5.54072	2.39106	1.19238	high
TCGA-DD-AAEA	1.57534	0	4.52164	4.88149	2.29371	0.779287	low
TCGA-DD-AAEB	1.30959	0	3.3181	3.35984	1.9176	0.198545	low
TCGA-DD-AAED	2.09041	0	3.7923	4.52622	2.39389	0.51331	low
TCGA-DD-AAEE	2.21918	0	6.35126	4.5461	2.88325	1.89284	high
TCGA-DD-AAEG	1.96986	0	5.49214	5.116	2.28945	1.29563	high
TCGA-DD-AAEH	2.14795	0	4.64125	3.94979	2.47716	0.585543	low
TCGA-DD-AAEI	4.19452	0	5.00612	4.62684	1.89206	0.703317	low
TCGA-DD-AAEK	2.92329	0	5.07463	4.71575	2.05062	0.811769	low
TCGA-DD-AAVP	7.53973	0	5.7276	4.51654	3.56733	1.98747	high
TCGA-DD-AAVQ	7.47397	0	4.71157	5.06174	2.48527	1.0015	low
TCGA-DD-AAVR	6.88493	0	5.40557	4.07617	2.0134	0.685296	low
TCGA-DD-AAVS	4.99452	0	5.22967	5.14092	2.35406	1.21092	high
TCGA-DD-AAVU	6.03288	0	6.20667	4.60778	2.46188	1.50309	high
TCGA-DD-AAVV	6.72603	0	5.37329	5.5952	3.19875	2.34999	high
TCGA-DD-AAVW	6.34795	0	4.6225	4.56518	2.21514	0.678681	low
TCGA-DD-AAVX	4.70685	0	5.41482	3.84083	1.62418	0.514898	low
TCGA-DD-AAVY	5.39726	0	6.01381	4.6635	2.2802	1.30598	high
TCGA-DD-AAVZ	5.20548	0	5.06507	5.01919	2.08177	0.941363	low
TCGA-DD-AAW0	5.52055	0	5.19568	4.94915	2.09105	0.967161	low
TCGA-DD-AAW1	5.44932	0	4.7545	4.16489	2.39691	0.651554	low
TCGA-DD-AAW2	5.08219	0	5.58909	4.10159	2.4223	0.907057	low
TCGA-DD-AAW3	4.47397	0	5.01428	4.9305	2.24479	0.955964	low
TCGA-ED-A459	2.49315	0	5.29294	5.03268	3.48113	2.01184	high
TCGA-ED-A4XI	2.24384	0	4.25957	4.18561	1.84805	0.413378	low
TCGA-ED-A5KG	2.33973	0	4.77683	4.70566	3.22952	1.2431	high
TCGA-ED-A627	1.1589	0	4.6628	3.99343	2.28094	0.549466	low
TCGA-ED-A66X	1.11233	0	4.83257	5.61806	2.78262	1.55858	high
TCGA-ED-A66Y	0.810959	1	4.78842	4.93972	2.54707	1.00734	high
TCGA-ED-A7PX	0.0164384	0	5.50635	5.20512	3.10211	1.9891	high
TCGA-ED-A7PY	1.06849	0	4.46594	4.55489	2.53501	0.735687	low
TCGA-ED-A7PZ	0.0164384	0	5.86857	4.70757	2.39463	1.32349	high
TCGA-ED-A7XO	1.16986	0	5.38014	3.88913	2.28474	0.707851	low
TCGA-ED-A7XP	1.09589	0	6.15368	5.49778	2.8412	2.63014	high
TCGA-ED-A82E	1.11781	0	5.17025	5.01674	3.00394	1.51618	high
TCGA-ED-A8O5	1.11233	0	4.64196	4.27725	2.41872	0.660929	low
TCGA-ED-A8O6	0.153425	1	4.89144	5.52707	2.66096	1.44749	high
TCGA-ED-A97K	0.0164384	0	4.74215	4.88797	2.7149	1.04455	high
TCGA-EP-A12J	1.56164	0	4.96058	5.06947	2.39785	1.0699	high
TCGA-EP-A26S	1.66575	0	4.86656	4.33568	1.98448	0.607474	low
TCGA-EP-A2KA	1.71781	1	4.55609	5.21417	2.25011	0.90044	low
TCGA-EP-A2KB	1.63288	1	5.32637	5.07902	1.94452	1.01097	high
TCGA-EP-A2KC	0.0520548	1	5.42854	5.14875	2.45548	1.38468	high
TCGA-EP-A3JL	0.830137	0	5.3511	5.07418	2.80673	1.52918	high
TCGA-EP-A3RK	0.994521	0	5.79434	5.40963	2.70022	2.03628	high
TCGA-ES-A2HS	1.88493	1	4.25631	4.12214	2.22816	0.479679	low
TCGA-ES-A2HT	1.2	1	5.24025	3.89981	2.04761	0.600177	low
TCGA-FV-A23B	5.07397	1	4.6211	5.33606	2.75928	1.24235	high
TCGA-FV-A2QQ	1.99726	0	5.57477	5.12541	2.25086	1.32248	high
TCGA-FV-A2QR	1.59178	1	4.77139	5.53213	2.98497	1.60736	high
TCGA-FV-A3I0	2.32329	0	5.82775	4.75966	3.38046	2.11859	high
TCGA-FV-A3I1	0.676712	1	5.01918	5.40755	2.65784	1.44401	high
TCGA-FV-A3R2	0.531507	1	5.98078	4.95453	2.90511	1.97203	high
TCGA-FV-A3R3	1.00274	1	4.41975	4.66832	1.86954	0.555467	low
TCGA-FV-A495	0.00273973	0	6.14383	4.36931	1.68491	0.911872	low
TCGA-FV-A496	0.0273973	0	4.65668	4.59632	2.37439	0.752516	low
TCGA-FV-A4ZP	6.81096	1	5.09154	5.86169	1.47858	1.04953	high
TCGA-FV-A4ZQ	0.0328767	0	5.70849	5.02812	2.69995	1.65278	high
TCGA-G3-A25S	1.13973	1	6.4801	5.02143	2.99358	2.60891	high
TCGA-G3-A25T	4.25479	0	5.84385	4.6343	3.19137	1.84357	high
TCGA-G3-A25U	4.48219	0	4.90389	3.94588	2.72862	0.73397	low
TCGA-G3-A25V	2.35616	0	4.62906	4.76626	2.21006	0.743648	low
TCGA-G3-A25X	4.87397	0	4.89628	5.04712	2.47797	1.07076	high
TCGA-G3-A25Y	1.23836	1	5.43439	5.25815	3.19623	2.06683	high
TCGA-G3-A25Z	1.79452	0	5.31625	4.26508	1.96376	0.702648	low
TCGA-G3-A3CG	1.84384	0	4.74869	4.75736	2.95307	1.10432	high
TCGA-G3-A3CH	2.13699	0	4.82679	4.27591	2.16299	0.632498	low
TCGA-G3-A3CI	0.493151	0	4.10657	3.35669	1.61876	0.239205	low
TCGA-G3-A3CJ	1.6274	0	4.78933	4.05008	1.49742	0.411005	low
TCGA-G3-A3CK	1.60274	0	4.95211	4.46776	2.45066	0.832241	low
TCGA-G3-A5SI	2.10411	1	4.96223	3.71944	3.09607	0.806827	low
TCGA-G3-A5SJ	1.91233	0	5.32322	4.33333	3.10866	1.24565	high
TCGA-G3-A5SK	2.03836	0	4.06783	3.06918	2.64597	0.335069	low
TCGA-G3-A5SL	1.70137	0	4.79675	4.40709	2.1258	0.651372	low
TCGA-G3-A5SM	1.42466	0	4.84656	4.65956	2.22937	0.782822	low
TCGA-G3-A6UC	1.83836	0	4.58636	4.1272	2.49366	0.625025	low
TCGA-G3-A7M5	1.22466	0	5.6934	4.10979	2.43371	0.95597	low
TCGA-G3-A7M6	1.73151	0	4.45064	5.66641	3.70684	2.09911	high
TCGA-G3-A7M7	0.989041	0	5.13769	4.72153	2.39881	0.984309	low
TCGA-G3-A7M8	1.17808	0	4.33951	3.64802	2.26592	0.407811	low
TCGA-G3-A7M9	0.153425	1	5.52191	5.52323	3.77347	3.1713	high
TCGA-G3-AAUZ	1.31507	0	5.12247	4.27231	2.0488	0.676849	low
TCGA-G3-AAV0	1.30411	0	4.62925	3.8649	2.33147	0.5235	low
TCGA-G3-AAV1	0.983562	1	5.7626	4.60251	2.479	1.25641	high
TCGA-G3-AAV2	1.01918	0	5.11492	4.39878	2.65333	0.949603	low
TCGA-G3-AAV3	1.12877	0	5.06996	4.64403	3.22333	1.36188	high
TCGA-G3-AAV4	0.0739726	1	5.35588	4.42126	2.428	0.953888	low
TCGA-G3-AAV5	0.969863	0	6.52905	5.68771	2.29525	2.59213	high
TCGA-G3-AAV6	0.178082	1	5.29691	4.87078	3.08723	1.55587	high
TCGA-G3-AAV7	0.989041	0	4.76869	6.02167	4.73129	4.55819	high
TCGA-GJ-A3OU	2.40822	0	4.9901	4.99737	2.564	1.13358	high
TCGA-GJ-A6C0	0.0849315	1	4.90797	4.36368	3.25554	1.13835	high
TCGA-GJ-A9DB	0.183562	1	5.2299	4.41986	2.66226	1.00997	high
TCGA-HP-A5MZ	0.249315	1	4.88601	4.56152	2.9245	1.05577	high
TCGA-HP-A5N0	2.06027	1	4.84703	4.47272	2.82165	0.95068	low
TCGA-K7-A5RF	1.72877	0	4.29493	3.34223	1.49108	0.242048	low
TCGA-K7-A5RG	1.42192	0	5.13743	4.49124	2.88294	1.11359	high
TCGA-K7-A6G5	1.40274	0	4.86625	5.25289	2.62361	1.24307	high
TCGA-K7-AAU7	0.983562	0	5.44498	4.92098	3.00257	1.62676	high
TCGA-KR-A7K0	0.178082	1	4.47482	4.89068	2.39419	0.804586	low
TCGA-KR-A7K2	2.27123	0	4.49846	4.2491	2.41821	0.614552	low
TCGA-KR-A7K7	2.60548	0	5.75102	5.25615	3.1517	2.30716	high
TCGA-KR-A7K8	2.48219	0	5.44287	5.31194	2.189	1.32306	high
TCGA-LG-A6GG	1.06027	0	5.53446	4.44891	1.56032	0.691698	low
TCGA-LG-A9QC	1.16438	0	5.46298	3.9189	2.31802	0.754363	low
TCGA-LG-A9QD	1.00274	0	4.83968	4.86902	2.27533	0.87702	low
TCGA-MI-A75C	0.79726	0	6.29793	5.26441	2.14546	1.81127	high
TCGA-MI-A75E	1.38904	0	4.87208	5.00703	2.74564	1.18067	high
TCGA-MI-A75G	1.91233	0	5.51301	4.07759	2.09911	0.746634	low
TCGA-MI-A75H	2.04658	0	5.51521	3.94506	2.04288	0.685398	low
TCGA-MI-A75I	1.72603	0	5.84931	4.60461	2.65686	1.41767	high
TCGA-MR-A520	0.627397	0	4.17842	3.64559	2.05145	0.344363	low
TCGA-MR-A8JO	0.90411	0	4.72355	3.59042	2.69957	0.571751	low
TCGA-NI-A4U2	4.90685	1	4.49056	3.77017	2.27528	0.461017	low
TCGA-NI-A8LF	2.18904	0	4.79182	4.22333	2.10463	0.592196	low
TCGA-O8-A75V	1.47397	0	5.46639	5.5149	1.70935	1.16879	high
TCGA-PD-A5DF	1.75068	1	4.91364	4.263	2.99078	0.962484	low
TCGA-QA-A7B7	0.257534	0	5.21311	5.34383	3.09927	1.87208	high
TCGA-RC-A6M4	0.060274	0	5.56226	4.32631	1.86457	0.763843	low
TCGA-RC-A6M5	0.0410959	0	4.83345	3.9447	2.09349	0.528338	low
TCGA-RC-A6M6	0.0246575	0	5.66476	5.19234	2.45808	1.56019	high
TCGA-RC-A7S9	1.75342	0	4.29647	4.02968	2.43136	0.514701	low
TCGA-RC-A7SB	1.61096	0	5.61498	3.66759	2.05415	0.633452	low
TCGA-RC-A7SF	1.5863	0	5.10012	3.41405	2.1442	0.475475	low
TCGA-RC-A7SH	1.28219	0	4.8194	6.18668	2.4032	1.67747	high
TCGA-RC-A7SK	1.29315	0	5.5853	4.47241	1.63128	0.738303	low
TCGA-RG-A7D4	3.00822	0	6.29281	5.28797	2.8512	2.54633	high
TCGA-T1-A6J8	0.0630137	0	5.13414	4.60097	2.01033	0.775151	low
TCGA-UB-A7MA	2.32329	0	5.11507	4.95427	2.68209	1.23797	high
TCGA-UB-A7MB	1.64658	0	4.87514	5.76733	3.09277	1.96413	high
TCGA-UB-A7MC	1.36986	0	5.24544	4.63466	3.08179	1.36492	high
TCGA-UB-A7MD	0.142466	1	5.55174	5.32375	2.30595	1.4706	high
TCGA-UB-A7ME	1.33151	0	4.80822	4.83126	2.46332	0.929629	low
TCGA-UB-A7MF	0.586301	1	4.3236	4.88952	3.02228	1.01473	high
TCGA-UB-AA0U	0.89589	0	4.49892	5.18491	2.23576	0.861842	low
TCGA-UB-AA0V	0.860274	0	4.02496	3.68427	1.89673	0.305668	low
TCGA-WJ-A86L	0.945205	0	4.66586	6.23846	2.98978	2.12295	high
TCGA-WQ-A9G7	0.0821918	0	5.34612	5.44736	2.97935	1.95991	high
TCGA-WQ-AB4B	1.08219	0	4.7023	4.24727	1.45897	0.425634	low
TCGA-WX-AA44	1.68493	0	4.46063	5.82572	2.77865	1.46383	high
TCGA-WX-AA46	2.07123	0	4.42495	3.07617	1.5405	0.231838	low
TCGA-WX-AA47	1.52329	1	4.76576	3.58466	2.22971	0.465253	low
TCGA-XR-A8TC	3.66849	0	4.59403	4.81111	2.26806	0.768612	low
TCGA-XR-A8TD	2.82192	0	5.00343	4.44845	2.28695	0.780326	low
TCGA-XR-A8TE	2.53425	0	4.43564	3.87092	2.2853	0.473858	low
TCGA-XR-A8TF	1.89863	1	5.58194	4.21159	2.42177	0.950319	low
TCGA-XR-A8TG	2.46027	0	4.24427	3.95958	2.35235	0.470088	low
TCGA-YA-A8S7	1.12877	1	5.14624	5.69826	3.22375	2.26664	high
TCGA-ZP-A9CV	2.98082	1	4.57688	5.72707	3.3175	1.89336	high
TCGA-ZP-A9CY	2.14247	0	4.27353	4.04199	1.9661	0.411858	low
TCGA-ZP-A9CZ	1.93425	0	5.44542	5.22414	2.83993	1.72901	high
TCGA-ZP-A9D0	2.98904	0	4.68618	4.17323	1.97003	0.519993	low
TCGA-ZP-A9D1	0.0575342	0	4.89537	4.7878	2.47264	0.949352	low
TCGA-ZP-A9D2	2.09589	1	5.55286	5.13449	3.67303	2.5695	high
TCGA-ZP-A9D4	1.08219	0	4.79062	4.64515	2.48822	0.858241	low
TCGA-ZS-A9CD	3.79726	1	5.0163	4.77219	3.01982	1.28248	high
TCGA-ZS-A9CE	3.4	0	5.33539	4.1899	2.15999	0.750782	low
TCGA-ZS-A9CF	6.60822	0	4.90621	3.76047	2.97139	0.757253	low
TCGA-ZS-A9CG	0.934247	0	4.83963	4.04564	2.82363	0.7818	low
